1 **A functional variant of the *SIDT2* gene involved in cholesterol transport is**  
2 **associated with HDL-C levels and premature coronary artery disease.**

3  
4 Paola León-Mimila,<sup>1,19</sup> Hugo Villamil-Ramírez,<sup>1,19</sup> Luis R. Macias-Kauffer,<sup>1,19</sup> Leonor Jacobo-  
5 Albavera,<sup>2,19</sup> Blanca E. López-Contreras,<sup>1</sup> Rosalinda Posadas-Sánchez,<sup>3</sup> Carlos Posadas-  
6 Romero,<sup>3</sup> Sandra Romero-Hidalgo,<sup>4</sup> Sofía Morán-Ramos,<sup>1,5</sup> Mayra Domínguez-Pérez,<sup>2</sup> Marisol  
7 Olivares-Arevalo,<sup>1</sup> Priscilla Lopez-Montoya,<sup>1</sup> Roberto Nieto-Guerra,<sup>1</sup> Víctor Acuña-Alonzo,<sup>6</sup>  
8 Gastón Macín-Pérez,<sup>6</sup> Rodrigo Barquera-Lozano,<sup>6</sup> Blanca E. del Río-Navarro,<sup>7</sup> Israel González-  
9 González,<sup>8</sup> Francisco Campos-Pérez,<sup>8</sup> Francisco Gómez-Pérez,<sup>9</sup> Victor J. Valdés,<sup>10</sup> Alicia  
10 Sampieri,<sup>10</sup> Juan G. Reyes-García,<sup>11</sup> Miriam del C. Carrasco-Portugal,<sup>12</sup> Francisco J. Flores-  
11 Murrieta,<sup>11,12</sup> Carlos A. Aguilar-Salinas,<sup>9,13</sup> Gilberto Vargas-Alarcón,<sup>14</sup> Diana Shih,<sup>15</sup> Peter J.  
12 Meikle,<sup>16</sup> Anna C. Calkin,<sup>17,18</sup> Brian G. Drew,<sup>17,18</sup> Luis Vaca,<sup>10</sup> Aldons J. Lusic,<sup>15</sup> Adriana Huertas-  
13 Vazquez,<sup>15</sup> Teresa Villarreal-Molina,<sup>2\*</sup> and Samuel Canizales-Quinteros,<sup>1\*</sup>

14  
15 <sup>1</sup>Unidad de Genómica de Poblaciones Aplicada a la Salud, Facultad de Química, UNAM/Instituto Nacional  
16 de Medicina Genómica (INMEGEN), Mexico City, 14610, Mexico

17 <sup>2</sup>Laboratorio de Enfermedades Cardiovasculares, INMEGEN, Mexico City, 14610, Mexico

18 <sup>3</sup>Departamento de Endocrinología, Instituto Nacional de Cardiología Ignacio Chávez, Mexico City, 14080,  
19 México

20 <sup>4</sup>Departamento de Genómica Computacional, INMEGEN, Mexico City, 14610, Mexico

21 <sup>5</sup>Consejo Nacional de Ciencia y Tecnología (CONACyT), Mexico City, 03940, México

22 <sup>6</sup>Escuela Nacional de Antropología e Historia, Mexico City, 14030, Mexico

23 <sup>7</sup> Hospital Infantil de México Federico Gómez, Mexico City, 06720, Mexico

24 <sup>8</sup>Hospital General Rubén Leñero, Mexico City, 11340, Mexico

25 <sup>9</sup>Unidad de Investigación en Enfermedades Metabólicas and Departamento de Endocrinología y  
26 Metabolismo, Instituto Nacional de Ciencias Médicas y Nutrición Salvador Zubirán, Mexico City, 14000,  
27 Mexico

28 <sup>10</sup>Instituto de Fisiología Celular, UNAM, Mexico City, 04510, Mexico

29 <sup>11</sup>Sección de Estudios de Posgrado e Investigación, Escuela Superior de Medicina, Instituto Politécnico  
30 Nacional, Mexico City, 11340, México

31 <sup>12</sup>Unidad de Investigación en Farmacología, Instituto Nacional de Enfermedades Respiratorias Ismael  
32 Cosío Villegas, Mexico City, 14080, Mexico

33 <sup>13</sup>Tecnológico de Monterrey, Escuela de Medicina y Ciencias de la Salud. Monterrey, N.L. 64710, Mexico

34 <sup>14</sup>Departamento de Biología Molecular, Instituto Nacional de Cardiología Ignacio Chávez, Mexico City,  
35 14080, Mexico

36 <sup>15</sup> Division of Cardiology, Department of Medicine, David Geffen School of Medicine, University of  
37 California, Los Angeles, CA, 90095, USA

38 <sup>16</sup>Head Metabolomics Laboratory, Baker Heart and Diabetes Institute, Melbourne, VIC 3004, Australia

39 <sup>17</sup>Baker Heart and Diabetes Institute, Melbourne, VIC, 3004, Australia

40 <sup>18</sup>Central Clinical School, Monash University, Melbourne, VIC, 3004, Australia.

41 <sup>19</sup>These authors contributed equally to this work.

42

43 \*Correspondence: [mvallareal@inmegen.gob.mx](mailto:mvallareal@inmegen.gob.mx) (T.V.-M.), [cani@unam.mx](mailto:cani@unam.mx) (S.C.-Q.).

44

45

46

47

48

49

50

51

52

53

54 **ABSTRACT**

55

56 Low HDL-C is the most frequent dyslipidemia in Mexicans, but few studies have  
57 examined the underlying genetic basis. Moreover, few lipid-associated variants have been  
58 tested for coronary artery disease (CAD) in Hispanic populations. Here, we performed a GWAS  
59 for HDL-C levels in 2,183 Mexican individuals, identifying 7 *loci*, including three with genome-  
60 wide significance and containing the candidate genes *CETP*, *ABCA1* and *SIDT2*. The *SIDT2*  
61 missense Val636Ile variant was associated with HDL-C levels for the first time, and this  
62 association was replicated in 3 independent cohorts ( $P=5.5 \times 10^{-21}$  in the conjoint analysis). The  
63 *SIDT2*/Val636Ile variant is more frequent in Native American and derived populations than in  
64 other ethnic groups. This variant was also associated with increased ApoA1 and  
65 glycerophospholipid serum levels, decreased LDL-C and ApoB levels and a lower risk of  
66 premature CAD. Because *SIDT2* was previously identified as a protein involved in sterol  
67 transport, we tested whether the *SIDT2*/Ile636 protein affected this function using an *in vitro* site-  
68 directed mutagenesis approach. The *SIDT2*/Ile636 protein showed increased uptake of the  
69 cholesterol analog dehydroergosterol, suggesting this variant is functional. Finally, liver  
70 transcriptome data from humans and the Hybrid Mouse Diversity Panel (HMDP) are consistent  
71 with the involvement of *SIDT2* in lipid and lipoprotein metabolism. In conclusion, this is the first  
72 study assessing genetic variants contributing to HDL-C levels and coronary artery disease in the  
73 Mexican population. Our findings provide new insight into the genetic architecture of HDL-C and  
74 highlight *SIDT2* as a new player in cholesterol and lipoprotein metabolism in humans.

75

76

## 77 INTRODUCTION

78  
79 Observational epidemiologic studies have reported that low plasma high density  
80 lipoprotein cholesterol (HDL-C) concentrations are an independent risk factor for cardiovascular  
81 disease.<sup>1-4</sup> Heritability of HDL-C serum levels has been estimated as high as 70% in various  
82 populations, including Mexican-Americans.<sup>5-8</sup> Genome wide association studies (GWAS) have  
83 successfully identified more than 150 loci associated with lipid levels mainly in European  
84 populations,<sup>9-12</sup> while relatively few GWAS have been performed in Mexicans.<sup>13-16</sup> The main  
85 HDL-C associated loci identified in Europeans are also associated with HDL-C levels in  
86 Mexicans, although novel loci have been reported in the latter group.<sup>14</sup> Notably, a functional  
87 variant apparently private to the Americas (*ABCA1* Arg230Cys) was found to be associated with  
88 lower HDL-C levels in Mexicans.<sup>17; 18</sup> Although low HDL-C levels are a well-established  
89 cardiovascular risk factor, Mendelian randomization studies have shown that most genetic  
90 variants associated with this trait are not associated with cardiovascular risk, suggesting that this  
91 relationship is not necessarily causal.<sup>19-21</sup> In this regard, it has been postulated that pleiotropic  
92 effects of the genetic variants or HDL-C particle functionality rather than HDL-C plasma  
93 concentrations may affect cardiovascular risk.<sup>22-25</sup>

94  
95 Low HDL-C levels are highly prevalent in the Mexican population.<sup>26-28</sup> This population  
96 group has been underrepresented in GWAS, and few lipid-associated variants have been tested  
97 for coronary artery disease (CAD) risk in Mexicans.<sup>29</sup> Therefore, we performed a GWAS for  
98 HDL-C levels in a cohort of Mexican individuals, using a multiethnic array that includes rare and  
99 common genetic variants for Hispanic populations. We then sought to replicate these  
100 associations in two independent cohorts: the Genetics of Atherosclerotic Disease (GEA) and the  
101 Morbid Obesity Surgery (MOBES) studies, and to test their possible effect on CAD risk. Lastly,

102 we explored the effect of the *SIDT2* gene, a member of a novel family of cholesterol  
103 transporters,<sup>30</sup> on lipid metabolism using existing liver transcriptome data from the Hybrid Mouse  
104 Diversity Panel, and the effect of the *SIDT2* Val636Ile variant on the cholesterol analog  
105 dehydroergosterol (DHE) uptake *in vitro* using a site-directed mutagenesis approach.

106

## 107 **SUBJECTS AND METHODS**

108

### 109 ***Study populations***

110

#### 111 *Discovery phase cohorts*

#### 112 *Obesity Research Study for Mexican Children (ORSMEC) and Mexican Adult cohorts*

113 The ORSMEC cohort includes 1,080 school-aged children (6-12 years), 553 with normal-  
114 weight and 527 with obesity. The Mexican adult cohort includes 1,073 adults aged 18-82 years,  
115 486 with normal-weight and 587 with obesity. Recruitment strategies, inclusion criteria,  
116 anthropometric and biochemical characteristics of both ORSMEC and the Mexican Adult cohorts  
117 have been previously described.<sup>31; 32</sup> Demographic and biochemical characteristics are  
118 described in Tables S1 and S2. Briefly, obesity, height and weight were measured following  
119 standard protocols and calibrated instruments as previously described.<sup>31</sup> BMI was calculated as  
120 body weight in kilograms divided by the square of height in meters (kg/m<sup>2</sup>). In adults, obesity  
121 was defined as a BMI  $\geq 30$  kg/m<sup>2</sup> and normal weight as BMI  $< 25$  kg/m<sup>2</sup> and  $\geq 18.5$  kg/m<sup>2</sup>  
122 according to World Health Organization (WHO) criteria.<sup>33</sup> In children, BMI percentile was  
123 calculated using age and sex specific BMI reference data, as recommended by the Centers for  
124 Disease Control and Prevention, and obesity was defined as BMI percentile  $\geq 95$  and normal  
125 weight as BMI percentile  $> 25$  and  $\leq 75$ .<sup>34</sup>

126

#### 127 *Replication phase cohorts*

128 *Genetics of Atherosclerotic Disease (GEA) cohort*

129         The GEA study was designed to examine the genetic bases of premature CAD in the  
130 Mexican population. We included 1,095 adults with premature coronary artery disease and 1,559  
131 individuals recruited as controls without CAD or family history of premature CAD, 413 of which  
132 had subclinical atherosclerosis defined by the presence of coronary artery calcification on helical  
133 computed axial tomography. Recruitment strategy, inclusion criteria, anthropometric and  
134 biochemical characteristics have been previously described.<sup>29</sup> Demographic and biochemical  
135 characteristics are described in Table S3.

136

137 *The Mexican Obesity Surgery (MOBES) cohort*

138         This cohort was designed to study the genetic and metabolomic bases of obesity and  
139 metabolic traits in Mexicans and includes 555 individuals with obesity (BMI  $\geq 35\text{kg/m}^2$ ) aged 18  
140 to 59 years who underwent bariatric surgery at the Rubén Leñero General Hospital in Mexico  
141 City. Inclusion criteria of this cohort were previously described.<sup>35</sup> Demographic and biochemical  
142 characteristics of this cohort are described in Table S4.

143

144 *Native Americans*

145         This cohort included 302 unrelated Native American individuals (Totonacs and Nahuas  
146 from East-central Mexico) aged over 18 years. Inclusion criteria, anthropometric and biochemical  
147 characteristics of these individuals have been previously described.<sup>18</sup> Demographic and  
148 biochemical characteristics of these individuals are described in Table S5.

149

150 *Ethics Statement*

151         This study was conducted according to the principles expressed in the Declaration of  
152 Helsinki and was approved by the Ethics Committees of participant institutions. All adult  
153 participants provided written informed consent prior to inclusion in the study. For children,

154 parents or guardians of each child signed the informed consent and children assented to  
155 participate. For Totonac and Nahua participants a translator was used as needed.

156

### 157 *Biochemical measurements*

158 For all cohorts, blood samples were drawn after 8-12 hours of overnight fasting to  
159 determine the serum levels of total cholesterol (TC), triglycerides (TG) and high-density  
160 lipoprotein cholesterol (HDL-C) by enzymatic assays as previously described.<sup>31</sup> Low density  
161 lipoprotein-cholesterol (LDL-C) levels were calculated with the equation of Friedewald *et al.*<sup>36</sup> In  
162 the GEA cohort, LDL-C levels were estimated with the equation of Friedewald modified by  
163 DeLong *et al.*,<sup>37</sup> and serum levels of Apolipoprotein A1 and B (ApoA1 and ApoB) were measured  
164 by immunonephelometry in a BN Pro Spec nephelometer (Dade Behring Marburg GmbH). In  
165 children, low HDL-C levels were defined as HDL-C <40 mg/dL according to the US National  
166 Cholesterol Education Program (NCEP) Expert Panel on Cholesterol Levels in Children and  
167 Adolescents. For adults low HDL-C levels were defined as HDL-C ≤40 mg/dL for men and ≤50  
168 mg/dL for women according to the US NCEP Adult Treatment Panel III (ATP III).<sup>38</sup>

169

### 170 *Lipidomic study in the MOBES cohort*

171 Lipidomic analysis was performed using 375 serum samples from MOBES cohort  
172 participants with previously described methods.<sup>39: 40</sup> Briefly, liquid chromatography–electrospray  
173 ionization–tandem mass spectrometry (LC–ESI–MS/MS) was used for lipidomic analysis on an  
174 Agilent 1290 liquid chromatography system. Liquid chromatography was performed on a Zorbax  
175 Eclipse Plus 1.8 μm C18, 50 × 2.1 mm column (Agilent Technologies). The mass spectrometer  
176 was operated in dynamic/scheduled multiple reaction monitoring (dMRM) mode. There were 630  
177 unique lipid species belonging to 31 lipid classes identified together with 15 stable isotope or  
178 non-physiological lipid standards.

179

## 180 **GWAS and quality control**

181 Genomic DNA was isolated from peripheral white blood cells using standard methods. A  
182 total of 2,153 children and adults included in the discovery phase were genotyped using the  
183 Multi-Ethnic Genotyping Array (MEGA, Illumina, San Diego, CA, USA), which included >1600k  
184 SNPs. This array includes both common and rare variants in Latin American, African, European  
185 and Asian populations. Standard quality control (QC) measures were as previously described.<sup>32</sup>  
186 Identity-by-descent (IBD) was estimated using Plink v1.07.<sup>41</sup> A total of 624,242 SNPs remained  
187 after QC measures. After imputation with Beagle,<sup>42</sup> 865,896 SNPs were included in the final  
188 analysis. The quantile-quantile (QQ) plot for the HDL-C GWAS was well calibrated for the null  
189 hypothesis ( $\lambda_{GC} = 1.017$ ), indicating adequate control for confounders (Figure S1).

190

## 191 **Selection of SNPs for the replication analyses**

192 Ten SNPs at 7 loci found to be significantly associated with HDL-C levels in the  
193 discovery phase ( $P < 1 \times 10^{-6}$ ) were selected for replication in two independent cohorts (GEA  
194 controls and MOBES). These were the lead SNP of 4 loci (rs9457930 in *LPAL2*, rs983309 in  
195 *PPP1R3B*, rs1514661 in *ADAMTS20* and rs1077834 in *LIPC*), and 6 independent SNPs at 3 loci  
196 (rs12448528 and rs11508026 in *CETP*, rs9282541 and rs4149310 in *ABCA1*, and rs17120425  
197 and rs10488698 near the *APOA5* cluster). SNPs were defined as independent when LD with  
198 other variants within the locus was low ( $r^2$  and  $D' < 0.2$ ). Selected SNPs were genotyped using  
199 KASP assays (LGC, U.S. <http://www.lgcgroup.com>). The *SIDT2*/rs17120425 variant was also  
200 genotyped in 302 Native Mexicans using a TaqMan assay (ABI Prism 7900HT Sequence  
201 Detection System, Applied Biosystems). Call rates exceeded 95% and no discordant genotypes  
202 were found in 10% of duplicate samples. No SNPs deviated from Hardy–Weinberg equilibrium in  
203 any group ( $P > 0.05$ ).

204

## 205 **Mendelian Randomization**



206 In order to test the causal effect of HDL-C levels on CAD we performed Mendelian  
207 Randomization (MR) analyses by using HDL-C associated SNPs as an instrument. In MR  
208 analyses, genetic variants act as proxies for HDL-C levels in a manner independent of  
209 confounders.<sup>43</sup> We used the inverse-variance weighted (IVW) method<sup>44</sup> which assumes that all  
210 genetic variants satisfy the instrumental variable assumptions (including zero pleiotropy). We  
211 also performed MR-Egger regression,<sup>45</sup> which allow each variant to exhibit pleiotropy. Only  
212 SNPs found to be associated with HDL-C in the GEA cohort (n=7) were included in the MR  
213 analyses. Both methods were performed with the aid of the Mendelian Randomization R  
214 package.<sup>46</sup>

215

### 216 **Ancestry Analysis**

217 Global ancestry was estimated as previously described.<sup>32</sup> Briefly, European (CEU) and  
218 Yoruba (YRI) individuals from the 1000 genomes project and fifteen Nahua and Totonac trios  
219 (Native American or NAT) were used as reference populations for ancestry analyses.  
220 Multidimensional scaling components were calculated in Plink v1.07.<sup>41</sup> Ancestral proportions  
221 were determined with Admixture.<sup>47</sup> Local ancestry was determined to identify the origin of  
222 chromosomal segments within the 11q23 region using RFMix.<sup>48</sup>

223

### 224 **Positive selection analysis of the *SIDT2* Val636Ile variant**

225 Extended haplotype homozygosity (EHH) values were estimated to seek whether the  
226 *SIDT2* derived “A” allele shows evidence of positive selection in a sample of Native Mexican  
227 individuals. Sabeti *et al.*<sup>49</sup> introduced EHH to exploit the decay of haplotype homozygosity as a  
228 function of genetic distance from a focal SNP. For this purpose, we used SNP 6.0 microarray  
229 data (Affymetrix) from 233 Native Mexicans (Nahuas and Totonacs), and genotyped  
230 *SIDT2*/rs17120425 in these individuals. The merged data were phased using Beagle.<sup>42</sup> Phased

231 alleles were coded as 0/1 (ancestral “G”/derived “A”) to obtain EHH values using the Selscan  
232 program.<sup>50</sup>

233

### 234 ***HEK293T cell cultures and wildtype and SIDT2/Ile636 transfection***

235 Human embryonic kidney (HEK293T) cells were purchased from the American Type  
236 Culture Collection (ATCC, Manassas, VA). Cells were grown on 35 mm culture dishes using  
237 Dulbecco’s modified Eagles medium (DMEM) (Invitrogen, Carlsbad, CA) supplemented with  
238 10% of heat inactivated fetal bovine serum (Wisent, premium quality, Canada), penicillin-  
239 streptomycin and glutamine (Life Technologies) in an incubator with humidity control at 37 °C  
240 and 5% CO<sub>2</sub>.

241

242 Human *SIDT2* was cloned from human cDNA CGI-40 (AF151999.1) obtained from the  
243 Riken Consortium (Japan). The product was cloned in pEGFP-N1 (Clontech, Mountain View,  
244 CA. USA). The *SIDT2/Ile636* variant was produced using the QuikChange® Site-Directed  
245 Mutagenesis Kit (Stratagene, Santa Clara, CA. USA) following manufacturer’s instructions. The  
246 wildtype *SIDT2/Val636* variant will be referred to as *SIDT2*, and the isoleucine variant will be  
247 referred as *Ile636/SIDT2*. The primers used to change valine for isoleucine were the following:  
248 FORWARD 5’- GCGTTCTGGATCATTTTTCTCCATCATT-3’ and REVERSE 5’-  
249 CGCAAGACCTAGTAAAAAGAGGTAGTAA-3’. Constructs were sequenced prior to use.

250

251 The plasmids containing *SIDT2-GFP* and *Ile636/SIDT2-GFP* were transfected to  
252 HEK293T cells grown on 35 mm Petri dishes with a glass bottom (MatTek, Ashland, MA, USA).  
253 For transfection we used a mixture of 1 µg of DNA and 6 µl CaCl<sub>2</sub> reaching 60 µl of final volume  
254 with distilled H<sub>2</sub>O. The mixture was added by dropping to HeBS buffer (50mM HEPES, 280mM  
255 NaCl, 1.5mM Na<sub>2</sub>HPO<sub>4</sub>, pH 7.05) and the final mixture was incubated for 30 minutes prior to

256 replacing with DMEM. The cells were incubated overnight with the transfection mixture, which  
257 was then replaced with fresh medium to perform the assays 24 hours later.

258

### 259 ***Fluorescent cholesterol analog dehydroergosterol (DHE) uptake experiments***

260 The naturally occurring blue fluorescent cholesterol analog DHE was purchased from  
261 Sigma (Saint Louis, MO). HEK293T cells expressing either SIDT2-GFP or SIDT2/Ile636-GFP  
262 were incubated with 5mM DHE solution, adding 300 mM methyl- $\beta$ -cyclodextrin (M $\beta$ CD). The  
263 solution was carefully resuspended and diluted in PBS to obtain a DHE/M $\beta$ CD ratio of 1:8  
264 (mol/mol) and 100  $\mu$ L of this solution were added to the HEK293T cells. Cells were monitored  
265 using the scanning confocal microscope (FV1000, Olympus Japan). Focal plane was positioned  
266 at the middle of the cells. Confocal images were acquired every 15 seconds with no averaging to  
267 reduce photobleaching. Excitation was at 300 nm using a solid-state laser and emission was  
268 collected at 535 nm.

269

### 270 ***Liver transcriptome analysis in the Hybrid Mouse Diversity Panel (HMDP) and humans***

271 *HMDP*: The HMDP is a collection of approximately 100 well-characterized inbred strains  
272 of mice that can be used to analyze the genetic and environmental factors underlying complex  
273 traits such as dyslipidemia, obesity, diabetes, atherosclerosis and fatty liver disease. We  
274 analyzed the liver transcriptome of strains from this panel carrying the human cholesteryl ester  
275 transfer protein (CETP) and the human ApoE3-Leiden transgenes. At the age of about 8 weeks,  
276 these mice were placed on a “Western Style” synthetic high fat diet supplemented with 1%  
277 cholesterol.<sup>51</sup> After 16 weeks on this diet, plasma lipid profiles were measured by colorimetric  
278 analysis as previously described<sup>52; 53</sup> and animals were euthanized for the collection of liver  
279 tissue. Total RNA was isolated from the left lobe using the Qiagen (Valencia, CA) RNeasy kit  
280 (cat# 74104), as described.<sup>54</sup> Genome wide expression profiles were determined by  
281 hybridization to Affymetrix HT-MG\_430 PM microarrays. Microarray data were filtered as

282 previously described.<sup>55</sup> The ComBat method from the SVA Bioconductor package was used to  
283 remove known batch effects.<sup>56</sup> All animal work was conducted according to relevant national and  
284 international guidelines and was approved by the UCLA Institutional Animal Care and Use  
285 Committee (IACUC).

286  
287 *Humans:* Total RNA was extracted from liver biopsies of 144 MOBES participants using  
288 Trizol reagent (Invitrogen). Clinical and biochemical characteristics of this subgroup of patients  
289 are described in Table S6. RNA sequencing was performed as previously described.<sup>57</sup> Briefly,  
290 RNA quality was assessed using the Bioanalyzer RNA chip analysis to ensure that the RNA  
291 integrity number was >7. Complementary DNA libraries were prepared using the TruSeq RNA  
292 Stranded Total RNA Library Preparation kit (Illumina) and sequenced using an Illumina  
293 HiSeq2500 instrument, generating approximately 50 million reads/sample. After data quality  
294 control, sequencing reads were mapped to the human reference genome using TopHat software  
295 v2.0.<sup>58</sup> and quantified using Cufflinks software.<sup>59</sup>

296  
297 ***Statistical Methods***

298 For the discovery phase, genome-wide association with HDL-C was tested independently  
299 in 4 groups (normal-weight and obese children and normal-weight and obese adults) under an  
300 additive linear mixed model with sex, age and BMI percentile (children) or BMI (adults) as fixed  
301 effects, and the genetic relatedness matrix as a random effect. An inverse variance method was  
302 used to perform a meta-analysis of the 4 groups.<sup>60</sup> Genetic relationship matrices from genome-  
303 wide data were considered for the analysis using GCTA software.<sup>61</sup> A  $P$ -value  $<1 \times 10^{-8}$  was  
304 considered genome-wide significant, suggestive significance was defined as a  $P$ -value  $<1 \times 10^{-6}$ .  
305 Group heterogeneity in the meta-analysis was evaluated by  $I^2$  and Cochrane's  $Q$ <sup>62</sup> using the R  
306 package meta. We used publicly available databases such as the GWAS Catalog

307 (<https://www.ebi.ac.uk/gwas/home>) to annotate associated SNPs. SNPs within a 1Mb range of  
308 the *SIDT2*/Val636Ile variant were included in a locus zoom plot.<sup>63</sup>

309  
310 For the validation phase, linear regression under additive models was used to test for  
311 genetic associations with lipid traits (HDL-C, LDL-C, TC and TG levels) in the GEA control,  
312 MOBES and Native American cohorts, and to test for associations with lipid classes in the  
313 MOBES cohort. Genetic associations with premature CAD in the GEA cohort were tested using  
314 multiple logistic regression under additive models. All tests were adjusted by age, sex and BMI.  
315 Associations were tested using the SPSS Statistics package (IBM SPSS Statistics, version 24,  
316 Chicago, IL, USA), and statistical significance was considered at  $P < 0.05$ .

317  
318 Correlations of *SIDT2* liver expression with serum lipid levels and the liver transcriptome  
319 were performed using biweight midcorrelation (bicor) coefficient with the R package WGCNA, a  
320 robust alternative to Pearson's correlation coefficient not sensitive to outliers.<sup>64</sup> Genes  
321 significantly correlated with *SIDT2* expression in liver ( $P \leq 1.0 \times 10^{-4}$ ) were tested for pathway  
322 enrichment analysis using Metascape and ToppGene Suite software.<sup>65; 66</sup> Enrichment  $P$  values  
323  $< 0.05$  after FDR correction were considered significant.<sup>67</sup>

324

325

## 326 **RESULTS**

327

328 Low HDL-C levels were highly prevalent in Mexican children and adults (38 and 27%,  
329 respectively). This trait was significantly more frequent in obese as compared to lean individuals  
330 (43.6% vs 12.7% respectively in children, and 81.6% vs 35.4% respectively in adults;  $P < 0.001$ )  
331 (Tables S1 and S2). To identify loci associated with HDL-C levels, we carried out a GWAS in 2  
332 independent cohorts of Mexican children and adults using a multi-ethnic array. Of note, the

333 same HDL-C associated loci were found in children and adults, regardless of obesity status, and  
334 effect sizes were similar and showed the same directionality. There was no significant evidence  
335 of heterogeneity (Table S7), and therefore a fixed-effects meta-analysis was conducted.

336  
337 In total, we identified 64 variants distributed across 7 *loci* associated with HDL-C levels  
338 with genome wide or suggestive significance ( $P < 1.0 \times 10^{-6}$ ) after adjusting for age, sex, BMI and  
339 ancestry (Figure 1, Table S7). Most of the 64 variants were also associated with other lipid  
340 parameters (Table S7). Four SNPs showed genome-wide significance ( $P < 1.0 \times 10^{-8}$ ),  
341 rs11508026 and rs12448528 within the *CETP* locus on chromosome 16 ( $B = 3.02$  mg/dL;  
342  $P = 4.46 \times 10^{-18}$  and  $B = -2.79$  mg/dL;  $P = 5.92 \times 10^{-15}$ , respectively); rs9282541 within the *ABCA1*  
343 gene on chromosome 9 (Arg230Cys,  $B = -3.44$  mg/dL;  $P = 3.99 \times 10^{-13}$ ); and rs17120425 within the  
344 *SIDT2* gene (Val636Ile,  $B = 3.31$  mg/dL;  $P = 1.52 \times 10^{-11}$ ), the latter associated with HDL-C levels for  
345 the first time (Table 1). The gender stratified meta-analysis showed that the effect size of  
346 *SIDT2*/Val636Ile on HDL-C levels was similar in females ( $B = 3.48$ ,  $P = 1.9 \times 10^{-7}$ ) and males  
347 ( $B = 3.27$ ,  $P = 1.4 \times 10^{-5}$ ) (Table S8). Figure 2 shows the locus zoom plot for the rs17120425  
348 (*SIDT2*) region, including 658 SNPs spanning 1 Mb in chromosome 11q23. No nearby SNPs in  
349 LD ( $r^2 > 0.2$ ) with rs17120425 (*SIDT2*) were found.

350  
351 Notably, minor allele frequencies of *ABCA1*/Arg230Cys and *SIDT2*/Val636Ile variants  
352 are highest in populations from the Americas (Table S9). We then genotyped the  
353 *SIDT2*/Val636Ile variant in two independent Native American populations from central Mexico  
354 (Totonacs and Nahuas), which was also associated with higher HDL-C levels in these  
355 indigenous groups ( $B = 2.81$  mg/dL;  $P = 0.027$ ) (Table S10). Moreover, the rs17120425 “A” allele  
356 was significantly more frequent in Native Mexicans (15%) than in Mexican Mestizos (10.3%,  
357  $P = 0.001$ ) (Table S9), and local ancestry analysis revealed that this allele was found in a block of  
358 Native American origin in 98% of individuals. However, according to EHH analysis, LD

359 extension break down was similar in the ancestral and derived rs17120425 alleles, with no  
360 evidence of positive selection (Figure S2).

361

362 ***Replication of associations with HDL-C Levels and other lipid traits in independent***  
363 ***cohorts***

364 We then sought to replicate associations with HDL-C levels in 1,559 controls without  
365 CAD from the GEA cohort. Seven of the 10 variants associated with HDL-C levels in the  
366 discovery phase replicated in GEA controls ( $P < 0.010$ , Table 2): rs12448528 and rs11508026  
367 within the *CETP* gene ( $P = 7.2 \times 10^{-11}$  and  $P = 2.9 \times 10^{-9}$ , respectively), rs983309 (*PPP1R3B*,  
368  $P = 4.0 \times 10^{-6}$ ), rs17120425/Val636Ile (*SIDT2*,  $P = 7.0 \times 10^{-6}$ ), rs9282541 and rs4149310 (*ABCA1*,  
369  $P = 2.0 \times 10^{-5}$  and  $P = 0.01$ , respectively) and rs10488698 (*BUD13-ZPR1-APOC3-APOA4-APOA5-*  
370 *APOA1* cluster,  $P = 6.5 \times 10^{-5}$ ). Altogether, these seven variants explained ~25% of HDL-C level  
371 variation ( $P_{\text{Genetic Risk Score}} = 7.0 \times 10^{-15}$ ). Table 2 shows associations of these SNPs with other lipid  
372 traits in the GEA cohort. *SIDT2*/Val636Ile and rs10488698 (*BUD13-ZPR1-APOC3-APOA4-*  
373 *APOA5-APOA1* cluster) were both associated with higher HDL-C and ApoA1 levels and lower  
374 LDL-C and ApoB levels. SNP rs10488698, but not *SIDT2*/Val636Ile was also significantly  
375 associated with lower TG levels. These two SNPs were the only variants associated both with  
376 higher ApoA1 and lower ApoB levels. In the MOBES cohort which includes 555 individuals with  
377 obesity, rs11508026 (*CETP*,  $P = 9.6 \times 10^{-5}$ ), rs9282541 (*ABCA1*,  $P = 1.1 \times 10^{-4}$ ) and *SIDT2*/Val636Ile  
378 ( $P = 0.003$ ) were significantly associated with HDL-C levels (Table 3).

379

380 The association of *SIDT2*/Val636Ile with HDL-C levels was highly significant in the  
381 conjoint analysis including the discovery phase and replication cohorts ( $B = 3.21$ ,  $P = 5.5 \times 10^{-21}$ ).

382

383 ***The SIDT2 Val636Ile variant is associated with serum glycerophospholipid levels in the***  
384 ***MOBES cohort.***

385 We then sought associations of the 4 HDL-C associated SNPs in the MOBES cohort with  
386 lipid classes known to be the main components of HDL-C lipoprotein particles (19 classes of  
387 cholesterol esters, phospholipids and TG).<sup>68; 69</sup> *SIDT2/Val636Ile* was significantly associated with  
388 higher glycerophospholipid serum levels ( $P<0.05$ ) (Figure 3), particularly with total  
389 phosphatidylcholine (PC), phosphatidylethanolamine (PE), phosphatidylglycerol (PG),  
390 phosphatidylinositol (PI) and phosphatidylserine (PS) as adjusted by age, sex, BMI and lipid  
391 lowering treatment. In contrast, *ABCA1* (rs9282541) and *CETP* variants (rs12448528 and  
392 rs11508026) were not significantly associated with any of these lipid classes.

393

#### 394 **Association with premature CAD and Mendelian randomization**

395 We then tested whether HDL-C variants were also associated with premature CAD in the  
396 GEA cohort. Four of the ten variants were significantly associated with CAD risk  
397 (rs9282541/*ABCA1*, rs10488698/*APOA1* cluster, rs1077834/*LIPC* and rs17120425/*SIDT2*).  
398 Rs10488698/*APOA1*-cluster and *SIDT2/Val636Ile* variants were associated with higher HDL-C  
399 levels and lower CAD risk, while rs9282541 (*ABCA1*) and rs1077834 (*LIPC*) were associated  
400 with both lower HDL-C levels and lower CAD risk (Table 4). Mendelian randomization analyses  
401 were performed including only the 7 variants significantly associated with HDL-C levels in the  
402 GEA control cohort. There was no evidence of a causal effect of HDL-C levels on CAD (IVW  
403  $P=0.253$  and MR-Egger  $P= 0.509$ ) (Table S11).

404

#### 405 **Fluorescent cholesterol analog uptake is enhanced in cells expressing Ile636/SIDT2.**

406 It was previously suggested that the transmembrane conserved cholesterol binding  
407 (CRAC) domain of murine *Sidt2* associates with the cholesterol analogue dehydroergosterol in  
408 HEK293 cells.<sup>30</sup> Because the *SIDT2/Val636Ile* variant is near the transmembrane CRAC domain  
409 in the human *SIDT2* protein, we evaluated the effect of this variant on DHE uptake in HEK293T  
410 cells. Interestingly, DHE uptake was enhanced in cells expressing the Ile636/*SIDT2* protein as



411 compared to cells expressing wildtype *SIDT2*, reaching the highest difference approximately 1.5  
412 minutes after adding DHE to the culture ( $6.85 \pm 0.42$  AU vs  $9.40 \pm 0.73$  AU,  $P < 0.01$ ) (Figure 4,  
413 Video S1).

414  
415 ***SIDT2* liver expression correlates with the expression of genes involved in lipid and**  
416 ***lipoprotein metabolism***

417 In the MOBES cohort, hepatic *SIDT2* expression did not differ according to the presence  
418 of the Val636Ile variant ( $P = 0.486$ ). Moreover, human *SIDT2* liver expression showed no  
419 significant correlation with lipid traits including HDL-C, TC, or TG levels (Figure 5A). In contrast,  
420 in HMDP mice fed with an atherogenic diet, hepatic *SidT2* expression correlated positively with  
421 HDL-C levels ( $r = 0.312$ ,  $P = 0.002$ ), and negatively with total cholesterol and TG levels ( $r = -0.381$ ,  
422  $P = 1.2 \times 10^{-4}$ ;  $r = -0.304$ ,  $P = 0.002$ , respectively) (Figure 5B).

423  
424 To analyze correlations between *SIDT2* expression and the liver transcriptome in mice,  
425 we used data from the genetically diverse HMDP where environmental factors are controlled. A  
426 total of 2,240 genes showed significant correlations with *SidT2* expression, and the most  
427 significantly enriched pathway was lipid and lipoprotein metabolism ( $P_{FDR} = 1.5 \times 10^{-7}$ ). In human  
428 liver tissue *SIDT2* expression correlated with the expression of 2,782 genes. Consistent with  
429 observations in mice, the lipid and lipoprotein metabolism pathways were among the most  
430 significantly enriched. *SIDT2* expression correlated with the expression of 227 genes that were  
431 shared by both mice and humans, and as expected metabolism of lipids and lipoproteins was  
432 the most significantly enriched pathway (Figure 5C-D).

433

434

435 **DISCUSSION**

436

437 Low HDL-C levels are the most common dyslipidemia in Mexicans, both in adults and  
438 children.<sup>26; 28</sup> Consistently, low HDL-C levels were highly prevalent in children and adults of the  
439 present study. Moreover, the prevalence of low HDL-C levels was significantly higher in obese  
440 than in lean individuals, in line with the high prevalence of metabolic syndrome observed in the  
441 Mexican population.<sup>70</sup>

442  
443 Here, using a GWAS for HDL-C levels in different cohorts of the Mexican population, we  
444 identified three loci associated with HDL-C levels at chromosomes 9, 11 and 16. Of note, the  
445 effect and direction of the associations were consistent in the 4 study groups (normal weight and  
446 obese children and adults). The most significant signal corresponds to the *CETP* locus, which is  
447 known to be one of the main drivers of HDL-C levels across populations.<sup>10; 15; 71</sup> The signal in  
448 chromosome 9 is the *ABCA1*/Arg230Cys variant (rs9282541) previously reported as associated  
449 with lower HDL-C levels by our group, apparently private to Native American and derived  
450 populations.<sup>17; 18</sup> The third genome-wide significant signal corresponds to a missense variant  
451 within the *SIDT2* gene (Val636Ile, rs17120425), associated with higher HDL-C levels. This  
452 association was replicated in 3 independent cohorts including Native Americans from Mexico.  
453 This is relevant because Native Americans live in rural areas, while the GEA and MOBES  
454 cohorts are urban populations, known to have different dietary habits, which may affect HDL-C  
455 levels.<sup>72</sup>

456  
457 To our knowledge, this is the first time that the *SIDT2*/Val636Ile variant has been  
458 associated with HDL-C levels. However, intronic *SIDT2* variants have been previously  
459 associated with lipid traits and the metabolic syndrome in multi-ethnic cohorts, mainly in  
460 Koreans.<sup>73; 74</sup> Nevertheless, these variants (rs2269399, rs7107152, rs1242229 and rs1784042)  
461 are not in LD with *SIDT2*/Val636Ile ( $r^2 < 0.2$ ). Although the *SIDT2*/Val636Ile variant is not private  
462 to the Americas, it is more frequent in Native Americans (15%) and Hispanics (6%), than other

463 ethnic groups (internationalgenome.org). Local ancestry analyses revealed that the derived “A”  
464 allele was of Native American origin in most individuals. However, the extended haplotype  
465 homozygosity (EHH) analysis of *SIDT2/Val636Ile* did not show evidence of recent positive  
466 selection.

467  
468 It is likely that previous GWAS in Mexicans failed to identify this SNP as associated with  
469 HDL-C because this variant was not included in the microarray platforms used in these studies  
470 and the paucity of Native American references for imputation.<sup>13-16</sup> This 11q23 region contains  
471 several lipid-associated signals, and it is thus necessary to define whether these signals are  
472 independent of *SIDT2/Val636Ile*. The *BUD13-ZPR1-APOC3-APOA4-APOA5-APOA1* cluster  
473 associated with TG levels is 400 Kb upstream *SIDT2*. Our regional LD analysis demonstrated  
474 the lead TG-associated SNP rs964184 (*APOA5*)<sup>9; 13</sup> and all other SNPs analyzed within this  
475 cluster were in low LD with *SIDT2/Val636Ile* ( $r^2 < 0.2$ ). This indicates that the *SIDT2* signal  
476 associated with HDL-C and SNPs within the *BUD13-ZPR1-APOC3-APOA4-APOA5-APOA1*  
477 cluster are in fact independent. Moreover, a previous GWAS in the Mexican population  
478 identified two intronic *SIK3* gene variants within the 11q23 region, rs139961185 associated with  
479 TG levels and rs11216230 with higher HDL-C levels.<sup>14</sup> The latter association was replicated in  
480 an independent Hispanic population.<sup>16</sup> Of note, rs11216230 is more frequent in Mexicans (11%)  
481 than in Europeans (1%) and is in high LD with *SIDT2/Val636Ile* in Mexican Americans from the  
482 1000 Genomes project ( $r^2 = 0.75$ ). This suggests that the association observed by Ko *et al.*<sup>14</sup>  
483 could be driven by the *SIDT2/Val636Ile* variant.

484  
485 In Mendelian randomization analyses, genetic variants act as proxies for HDL-C levels in  
486 a manner independent of confounders to analyze the causality of HDL-C levels on coronary  
487 artery disease. Our MR analysis is consistent with previous studies suggesting that higher HDL-  
488 C levels are not causally protective against coronary heart disease.<sup>19-21</sup> This suggests that the

489 effect of individual variants on CAD risk may be mediated by pleiotropic effects on other  
490 cardiovascular risk factors, or on HDL-C composition and functionality.<sup>22-25; 75</sup> The  
491 *SIDT2/Val636Ile* variant was associated with higher HDL-C levels and with lower risk of  
492 premature CAD. We thus explored whether this variant affects other cardiovascular risk  
493 parameters in addition to HDL-C levels. Notably, *SIDT2/Val636Ile* was also associated with  
494 higher ApoA1 levels, and lower LDL-C and ApoB serum levels in the GEA cohort. APOA1 is the  
495 major protein component of HDL-C particles, and a Mendelian randomization analysis in Finnish  
496 individuals reported that ApoA1 was not associated with risk of CAD.<sup>76</sup> A multivariable  
497 Mendelian randomization study examining serum lipid and apolipoprotein levels reported that  
498 only ApoB retained a robust relationship with the risk of CAD,<sup>77</sup> and recent Mendelian  
499 randomization studies suggest that ApoB is the primary lipid determinant of cardiovascular  
500 disease risk.<sup>78; 79</sup> Thus, the association of *SIDT2/Val636Ile* with decreased cardiovascular risk  
501 could be mediated by its effect on ApoB levels.

502

503 HDL lipidome composition has been associated with HDL-C functional properties,<sup>80-82</sup>  
504 Notably, of the 4 main variants associated with HDL-C levels in the present study, only  
505 *SIDT2/Val636Ile* was associated with lipid species, specifically with higher serum concentrations  
506 of several glycerophospholipid classes including PE, PG, PC, PI and PS. It has been reported  
507 that HDL-C particles enriched in phospholipids can increase HDL-C stability,<sup>83</sup> while decreased  
508 levels of phospholipids in HDL-C were found to impair cholesterol efflux and decrease the  
509 cardiovascular protective effects of HDLs.<sup>69; 82; 84</sup> Particularly, recent studies indicate that  
510 phosphatidylserine, a minor component of the monolayer surface of HDL-C, is enriched in small,  
511 dense HDL-C particles, which display potent anti-atherosclerotic activities.<sup>83; 85</sup> Although we  
512 measured phospholipids in serum and not directly in HDL-C particles, a limitation of the study,  
513 the association of *SIDT2/Val636Ile* with higher phospholipid levels is consistent with the lower  
514 cardiovascular risk conferred by this variant.

515  
516 The SIDT2 protein is found mainly in lysosome membranes,<sup>86</sup> is a lysosomal nucleic acid  
517 transporter, and is expressed in several tissues, including the liver.<sup>87-91</sup> The mammalian SIDT2  
518 protein has high homology to the *C. elegans* cholesterol uptake protein-1 (CUP-1).<sup>92</sup> SIDT2 has  
519 been identified as a sterol-interacting protein<sup>93</sup> and more recently as a cholesterol-binding  
520 protein.<sup>30</sup> Moreover, SIDT2 is predicted to contain two CRAC domains (Cholesterol  
521 Recognition/interaction Amino Acid Consensus), found in a broad range of proteins involved in  
522 cholesterol transport, metabolism and regulation.<sup>30; 94</sup> Specifically, the transmembrane CRAC  
523 domain from human SIDT1 and mouse SIDT2 appears to bind cholesterol.<sup>30</sup> The Val636Ile  
524 variant and the CRAC domain are located within the same transmembrane segment, and this  
525 variant is 19 amino acids upstream the tyrosine CRAC domain residue, suggested to interact  
526 with the cholesterol OH-polar group.<sup>30</sup> It is unknown if the Val636Ile variant modifies the  
527 interactions of the CRAC domain with cholesterol, thus affecting circulating lipid levels.

528  
529 In the present study, HEK293T cells expressing the Ile636/SIDT2 protein showed higher  
530 cholesterol analog DHE uptake than those expressing the wildtype protein. This increased  
531 uptake observed *in vitro*, may affect circulating levels of cholesterol-rich lipoproteins. Although  
532 the mechanism by which this variant increases HDL-C serum levels is unknown, ABCA1-  
533 mediated cholesterol efflux and HDL-C formation are primarily dependent on autophagy for  
534 cholesterol source.<sup>95</sup> Because *Sidt2*<sup>-/-</sup> deficient mice show blocked autophagosome maturation  
535 and altered hepatic lipid homeostasis,<sup>96</sup> it is tempting to speculate that the putative increased  
536 function of the Ile636 SIDT2 protein may enhance autophagy-mediated cholesterol flux, and thus  
537 ABCA1-mediated HDL-C formation.

538  
539 *Sidt2* knockout mice show a wide range of metabolic phenotypes including impaired  
540 glucose tolerance likely due to compromised NAADP-involved insulin secretion.<sup>96-100</sup> Meng *et*

541 *al.*,<sup>100</sup> showed that *Sid2* deficient mice present significantly increased serum total cholesterol,  
542 TG and LDL-C levels, and significantly lower HDL-C serum levels as compared to *Sid2*<sup>+/-</sup> mice.  
543 These findings are consistent with the inverse correlation between hepatic *Sid2* expression and  
544 total cholesterol and triglycerides levels, and the direct correlation of *Sid2* expression with HDL-  
545 C levels observed in the HMDP. Moreover, *Sid2*<sup>-/-</sup> mice not only have altered lipid serum levels,  
546 but also showed impaired liver function and liver steatosis.<sup>96; 99; 100</sup> Consistently, *Sid2* expression  
547 correlated with increased fat liver content in HMDP mice (data not shown). In contrast, in the  
548 MOBES cohort *SIDT2* liver expression did not correlate with serum lipid levels or liver steatosis,  
549 and the *SIDT2/Val636Ile* variant showed no association with non-alcoholic fatty liver disease in  
550 the GEA or MOBES cohorts (data not shown). Because MOBES cohort participants had morbid  
551 obesity and do not represent the overall population, the lack of correlation between *SIDT2* liver  
552 expression with lipid levels in this cohort must be interpreted with caution. Despite these  
553 differences between mice and humans, *SIDT2* expression correlations with the liver  
554 transcriptome revealed that the most significantly enriched pathways were lipid and lipoprotein  
555 metabolism in both species. Altogether, these findings support a role of *SIDT2* in lipid  
556 metabolism. Further studies are required to better understand the mechanisms by which *SIDT2*  
557 participates in cholesterol and lipoprotein metabolism at the cellular and systemic levels, and its  
558 role in cardiovascular risk.

559  
560 In conclusion, this is the first study assessing genetic variants contributing to HDL-C  
561 levels and coronary artery disease in the Mexican population. Our GWAS revealed for the first  
562 time that the *SIDT2/Val636Ile* variant is associated with increased HDL-C and phospholipid  
563 levels and decreased risk of CAD. We also provide evidence that the *SIDT2/Val636Ile* variant is  
564 functional, increasing the uptake of a cholesterol analog *in vitro*. Our data support a role of  
565 *SIDT2* in cholesterol and lipid metabolism. The mechanisms by which this protein affects lipid  
566 and metabolic parameters in humans require further investigation.

567

568

569 **Supplemental Data**

570 Supplemental Data include two figures, eleven tables and one video.

571

572 **Declaration of Interests**

573 The authors declare no competing interests.

574

575 **Acknowledgements**

576 We thank Luz E. Guillén for her technical support. We also thank Productos Medix S.A. de C.V.

577 for their support to perform this study. This work was supported by grants FOSISS-289699 and

578 PEI-230129 from Mexican National Council for Science and Technology (CONACyT).

579

580 **Web Resources**

581 R, <https://www.r-project.org>

582 PLINK, <http://zzz.bwh.harvard.edu/plink>

583 gnomAD, <https://gnomad.broadinstitute.org>

584 1000 Genomes, <https://www.internationalgenome.org>

585 GWAS Catalog, <https://www.ebi.ac.uk/gwas/home>

586 WCGNA, <https://horvath.genetics.ucla.edu/html/CoexpressionNetwork/Rpackages/WGCNA>

587 ToppGene, <https://toppgene.cchmc.org>

588 Metascape, <https://metascape.org>

589 OMIM, <http://www.omim.org>

590 HGNC, <http://www.genenames.org>

591

592 **Data Availability**

593 The datasets supporting the current study have not been deposited in a public repository  
594 because they are part of other studies in progress, but are available from the corresponding  
595 authors on reasonable request.



596 **REFERENCES**

- 597
- 598 1. Castelli, W.P. (1988). Cholesterol and lipids in the risk of coronary artery disease--the  
599 Framingham Heart Study. *Can J Cardiol* 4 Suppl A, 5A-10A.
- 600 2. Boden, W.E. (2000). High-density lipoprotein cholesterol as an independent risk factor in  
601 cardiovascular disease: assessing the data from Framingham to the Veterans Affairs  
602 High--Density Lipoprotein Intervention Trial. *Am J Cardiol* 86, 19L-22L.
- 603 3. Sharrett, A.R., Ballantyne, C.M., Coady, S.A., Heiss, G., Sorlie, P.D., Catellier, D., Patsch, W.,  
604 and Atherosclerosis Risk in Communities Study, G. (2001). Coronary heart disease  
605 prediction from lipoprotein cholesterol levels, triglycerides, lipoprotein(a), apolipoproteins  
606 A-I and B, and HDL density subfractions: The Atherosclerosis Risk in Communities  
607 (ARIC) Study. *Circulation* 104, 1108-1113.
- 608 4. Barter, P.J., Puranik, R., and Rye, K.A. (2007). New insights into the role of HDL as an anti-  
609 inflammatory agent in the prevention of cardiovascular disease. *Curr Cardiol Rep* 9, 493-  
610 498.
- 611 5. Mitchell, B.D., Kammerer, C.M., Blangero, J., Mahaney, M.C., Rainwater, D.L., Dyke, B.,  
612 Hixson, J.E., Henkel, R.D., Sharp, R.M., Comuzzie, A.G., et al. (1996). Genetic and  
613 environmental contributions to cardiovascular risk factors in Mexican Americans. The  
614 San Antonio Family Heart Study. *Circulation* 94, 2159-2170.
- 615 6. Qasim, A., and Rader, D.J. (2006). Human genetics of variation in high-density lipoprotein  
616 cholesterol. *Curr Atheroscler Rep* 8, 198-205.
- 617 7. Gao, C., Tabb, K.L., Dimitrov, L.M., Taylor, K.D., Wang, N., Guo, X., Long, J., Rotter, J.I.,  
618 Watanabe, R.M., Curran, J.E., et al. (2018). Exome Sequencing Identifies Genetic  
619 Variants Associated with Circulating Lipid Levels in Mexican Americans: The Insulin  
620 Resistance Atherosclerosis Family Study (IRASFS). *Sci Rep* 8, 5603.
- 621 8. Williams, P.T. (2020). Quantile-specific heritability of high-density lipoproteins with  
622 implications for precision medicine. *J Clin Lipidol* 14, 448-458 e440.
- 623 9. Teslovich, T.M., Musunuru, K., Smith, A.V., Edmondson, A.C., Stylianou, I.M., Koseki, M.,  
624 Pirruccello, J.P., Ripatti, S., Chasman, D.I., Willer, C.J., et al. (2010). Biological, clinical  
625 and population relevance of 95 loci for blood lipids. *Nature* 466, 707-713.
- 626 10. Willer, C.J., Schmidt, E.M., Sengupta, S., Peloso, G.M., Gustafsson, S., Kanoni, S., Ganna,  
627 A., Chen, J., Buchkovich, M.L., Mora, S., et al. (2013). Discovery and refinement of loci  
628 associated with lipid levels. *Nat Genet* 45, 1274-1283.
- 629 11. Wu, Y., Waite, L.L., Jackson, A.U., Sheu, W.H., Buyske, S., Absher, D., Arnett, D.K.,  
630 Boerwinkle, E., Bonnycastle, L.L., Carty, C.L., et al. (2013). Trans-ethnic fine-mapping of  
631 lipid loci identifies population-specific signals and allelic heterogeneity that increases the  
632 trait variance explained. *PLoS Genet* 9, e1003379.
- 633 12. Klarin, D., Damrauer, S.M., Cho, K., Sun, Y.V., Teslovich, T.M., Honerlaw, J., Gagnon, D.R.,  
634 DuVall, S.L., Li, J., Peloso, G.M., et al. (2018). Genetics of blood lipids among ~300,000  
635 multi-ethnic participants of the Million Veteran Program. *Nat Genet* 50, 1514-1523.
- 636 13. Weissglas-Volkov, D., Aguilar-Salinas, C.A., Nikkola, E., Deere, K.A., Cruz-Bautista, I.,  
637 Arellano-Campos, O., Munoz-Hernandez, L.L., Gomez-Munguia, L., Ordonez-Sanchez,  
638 M.L., Reddy, P.M., et al. (2013). Genomic study in Mexicans identifies a new locus for  
639 triglycerides and refines European lipid loci. *J Med Genet* 50, 298-308.
- 640 14. Ko, A., Cantor, R.M., Weissglas-Volkov, D., Nikkola, E., Reddy, P.M., Sinsheimer, J.S.,  
641 Pasaniuc, B., Brown, R., Alvarez, M., Rodriguez, A., et al. (2014). Amerindian-specific  
642 regions under positive selection harbour new lipid variants in Latinos. *Nat Commun* 5,  
643 3983.
- 644 15. Below, J.E., Parra, E.J., Gamazon, E.R., Torres, J., Krithika, S., Candille, S., Lu, Y.,  
645 Manichakul, A., Peralta-Romero, J., Duan, Q., et al. (2016). Meta-analysis of lipid-traits in

- 646 Hispanics identifies novel loci, population-specific effects, and tissue-specific enrichment  
647 of eQTLs. *Sci Rep* 6, 19429.
- 648 16. Graff, M., Emery, L.S., Justice, A.E., Parra, E., Below, J.E., Palmer, N.D., Gao, C., Duan, Q.,  
649 Valladares-Salgado, A., Cruz, M., et al. (2017). Genetic architecture of lipid traits in the  
650 Hispanic community health study/study of Latinos. *Lipids Health Dis* 16, 200.
- 651 17. Villarreal-Molina, M.T., Aguilar-Salinas, C.A., Rodriguez-Cruz, M., Riano, D., Villalobos-  
652 Comparan, M., Coral-Vazquez, R., Menjivar, M., Yescas-Gomez, P., Konigsoerg-  
653 Fainstein, M., Romero-Hidalgo, S., et al. (2007). The ATP-binding cassette transporter  
654 A1 R230C variant affects HDL cholesterol levels and BMI in the Mexican population:  
655 association with obesity and obesity-related comorbidities. *Diabetes* 56, 1881-1887.
- 656 18. Acuna-Alonzo, V., Flores-Dorantes, T., Kruit, J.K., Villarreal-Molina, T., Arellano-Campos,  
657 O., Hunemeier, T., Moreno-Estrada, A., Ortiz-Lopez, M.G., Villamil-Ramirez, H., Leon-  
658 Mimila, P., et al. (2010). A functional ABCA1 gene variant is associated with low HDL-  
659 cholesterol levels and shows evidence of positive selection in Native Americans. *Hum*  
660 *Mol Genet* 19, 2877-2885.
- 661 19. Voight, B.F., Peloso, G.M., Orho-Melander, M., Frikke-Schmidt, R., Barbalic, M., Jensen,  
662 M.K., Hindy, G., Holm, H., Ding, E.L., Johnson, T., et al. (2012). Plasma HDL cholesterol  
663 and risk of myocardial infarction: a mendelian randomisation study. *Lancet* 380, 572-580.
- 664 20. Holmes, M.V., Asselbergs, F.W., Palmer, T.M., Drenos, F., Lanktree, M.B., Nelson, C.P.,  
665 Dale, C.E., Padmanabhan, S., Finan, C., Swerdlow, D.I., et al. (2015). Mendelian  
666 randomization of blood lipids for coronary heart disease. *Eur Heart J* 36, 539-550.
- 667 21. Kawashiri, M.A., Tada, H., Nomura, A., and Yamagishi, M. (2018). Mendelian randomization:  
668 Its impact on cardiovascular disease. *J Cardiol* 72, 307-313.
- 669 22. Khera, A.V., Cuchel, M., de la Llera-Moya, M., Rodrigues, A., Burke, M.F., Jafri, K., French,  
670 B.C., Phillips, J.A., Mucksavage, M.L., Wilensky, R.L., et al. (2011). Cholesterol efflux  
671 capacity, high-density lipoprotein function, and atherosclerosis. *N Engl J Med* 364, 127-  
672 135.
- 673 23. Solovieff, N., Cotsapas, C., Lee, P.H., Purcell, S.M., and Smoller, J.W. (2013). Pleiotropy in  
674 complex traits: challenges and strategies. *Nat Rev Genet* 14, 483-495.
- 675 24. Kosmas, C.E., Christodoulidis, G., Cheng, J.W., Vittorio, T.J., and Lerakis, S. (2014). High-  
676 density lipoprotein functionality in coronary artery disease. *Am J Med Sci* 347, 504-508.
- 677 25. Burgess, S., Foley, C.N., Allara, E., Staley, J.R., and Howson, J.M.M. (2020). A robust and  
678 efficient method for Mendelian randomization with hundreds of genetic variants. *Nat*  
679 *Commun* 11, 376.
- 680 26. Aguilar-Salinas, C.A., Olaiz, G., Valles, V., Torres, J.M., Gomez Perez, F.J., Rull, J.A.,  
681 Rojas, R., Franco, A., and Sepulveda, J. (2001). High prevalence of low HDL cholesterol  
682 concentrations and mixed hyperlipidemia in a Mexican nationwide survey. *J Lipid Res* 42,  
683 1298-1307.
- 684 27. Aguilar-Salinas, C.A., Canizales-Quinteros, S., Rojas-Martinez, R., Mehta, R., Villarreal-  
685 Molina, M.T., Arellano-Campos, O., Riba, L., Gomez-Perez, F.J., and Tusie-Luna, M.T.  
686 (2009). Hypoalphalipoproteinemia in populations of Native American ancestry: an  
687 opportunity to assess the interaction of genes and the environment. *Curr Opin Lipidol* 20,  
688 92-97.
- 689 28. Hernandez-Alcaraz, C., Aguilar-Salinas, C.A., Mendoza-Herrera, K., Pedroza-Tobias, A.,  
690 Villalpando, S., Shamah-Levy, T., Rivera-Dommarco, J., Hernandez-Avila, M., and  
691 Barquera, S. (2020). Dyslipidemia prevalence, awareness, treatment and control in  
692 Mexico: results of the Ensanut 2012. *Salud Publica Mex* 62, 137-146.
- 693 29. Villarreal-Molina, T., Posadas-Romero, C., Romero-Hidalgo, S., Antunez-Arguelles, E.,  
694 Bautista-Grande, A., Vargas-Alarcon, G., Kimura-Hayama, E., Canizales-Quinteros, S.,  
695 Juarez-Rojas, J.G., Posadas-Sanchez, R., et al. (2012). The ABCA1 gene R230C variant

- 696 is associated with decreased risk of premature coronary artery disease: the genetics of  
697 atherosclerotic disease (GEA) study. *PLoS One* 7, e49285.
- 698 30. Mendez-Acevedo, K.M., Valdes, V.J., Asanov, A., and Vaca, L. (2017). A novel family of  
699 mammalian transmembrane proteins involved in cholesterol transport. *Sci Rep* 7, 7450.
- 700 31. Leon-Mimila, P., Villamil-Ramirez, H., Villalobos-Comparan, M., Villarreal-Molina, T.,  
701 Romero-Hidalgo, S., Lopez-Contreras, B., Gutierrez-Vidal, R., Vega-Badillo, J., Jacobo-  
702 Albavera, L., Posadas-Romeros, C., et al. (2013). Contribution of common genetic  
703 variants to obesity and obesity-related traits in mexican children and adults. *PLoS One* 8,  
704 e70640.
- 705 32. Macias-Kauffer, L.R., Villamil-Ramirez, H., Leon-Mimila, P., Jacobo-Albavera, L., Posadas-  
706 Romero, C., Posadas-Sanchez, R., Lopez-Contreras, B.E., Moran-Ramos, S., Romero-  
707 Hidalgo, S., Acuna-Alonzo, V., et al. (2019). Genetic contributors to serum uric acid  
708 levels in Mexicans and their effect on premature coronary artery disease. *Int J Cardiol*  
709 279, 168-173.
- 710 33. (2000). Obesity: preventing and managing the global epidemic. Report of a WHO  
711 consultation. *World Health Organ Tech Rep Ser* 894, i-xii, 1-253.
- 712 34. Kuczmarski, R.J., Ogden, C.L., Grummer-Strawn, L.M., Flegal, K.M., Guo, S.S., Wei, R.,  
713 Mei, Z., Curtin, L.R., Roche, A.F., and Johnson, C.L. (2000). CDC growth charts: United  
714 States. *Adv Data*, 1-27.
- 715 35. Leon-Mimila, P., Vega-Badillo, J., Gutierrez-Vidal, R., Villamil-Ramirez, H., Villareal-Molina,  
716 T., Larrieta-Carrasco, E., Lopez-Contreras, B.E., Kauffer, L.R., Maldonado-Pintado, D.G.,  
717 Mendez-Sanchez, N., et al. (2015). A genetic risk score is associated with hepatic  
718 triglyceride content and non-alcoholic steatohepatitis in Mexicans with morbid obesity.  
719 *Exp Mol Pathol* 98, 178-183.
- 720 36. Friedewald, W.T., Levy, R.I., and Fredrickson, D.S. (1972). Estimation of the concentration  
721 of low-density lipoprotein cholesterol in plasma, without use of the preparative  
722 ultracentrifuge. *Clin Chem* 18, 499-502.
- 723 37. DeLong, D.M., DeLong, E.R., Wood, P.D., Lippel, K., and Rifkind, B.M. (1986). A  
724 comparison of methods for the estimation of plasma low- and very low-density lipoprotein  
725 cholesterol. *The Lipid Research Clinics Prevalence Study. JAMA* 256, 2372-2377.
- 726 38. National Cholesterol Education Program Expert Panel on Detection, E., and Treatment of  
727 High Blood Cholesterol in, A. (2002). Third Report of the National Cholesterol Education  
728 Program (NCEP) Expert Panel on Detection, Evaluation, and Treatment of High Blood  
729 Cholesterol in Adults (Adult Treatment Panel III) final report. *Circulation* 106, 3143-3421.
- 730 39. Parker, B.L., Calkin, A.C., Seldin, M.M., Keating, M.F., Tarling, E.J., Yang, P., Moody, S.C.,  
731 Liu, Y., Zerenturk, E.J., Needham, E.J., et al. (2019). An integrative systems genetic  
732 analysis of mammalian lipid metabolism. *Nature* 567, 187-193.
- 733 40. Huynh, K., Barlow, C.K., Jayawardana, K.S., Weir, J.M., Mellett, N.A., Cinel, M., Magliano,  
734 D.J., Shaw, J.E., Drew, B.G., and Meikle, P.J. (2019). High-Throughput Plasma  
735 Lipidomics: Detailed Mapping of the Associations with Cardiometabolic Risk Factors. *Cell*  
736 *Chem Biol* 26, 71-84 e74.
- 737 41. Purcell, S., Neale, B., Todd-Brown, K., Thomas, L., Ferreira, M.A., Bender, D., Maller, J.,  
738 Sklar, P., de Bakker, P.I., Daly, M.J., et al. (2007). PLINK: a tool set for whole-genome  
739 association and population-based linkage analyses. *Am J Hum Genet* 81, 559-575.
- 740 42. Browning, B.L., and Browning, S.R. (2016). Genotype Imputation with Millions of Reference  
741 Samples. *Am J Hum Genet* 98, 116-126.
- 742 43. Corbin, L.J., Richmond, R.C., Wade, K.H., Burgess, S., Bowden, J., Smith, G.D., and  
743 Timpson, N.J. (2016). BMI as a Modifiable Risk Factor for Type 2 Diabetes: Refining and  
744 Understanding Causal Estimates Using Mendelian Randomization. *Diabetes* 65, 3002-  
745 3007.

- 746 44. Burgess, S., Butterworth, A., and Thompson, S.G. (2013). Mendelian randomization analysis  
747 with multiple genetic variants using summarized data. *Genet Epidemiol* 37, 658-665.
- 748 45. Bowden, J., Davey Smith, G., and Burgess, S. (2015). Mendelian randomization with invalid  
749 instruments: effect estimation and bias detection through Egger regression. *Int J*  
750 *Epidemiol* 44, 512-525.
- 751 46. Yavorska, O.O., and Burgess, S. (2017). MendelianRandomization: an R package for  
752 performing Mendelian randomization analyses using summarized data. *Int J Epidemiol*  
753 46, 1734-1739.
- 754 47. Alexander, D.H., Novembre, J., and Lange, K. (2009). Fast model-based estimation of  
755 ancestry in unrelated individuals. *Genome Res* 19, 1655-1664.
- 756 48. Maples, B.K., Gravel, S., Kenny, E.E., and Bustamante, C.D. (2013). RFMix: a discriminative  
757 modeling approach for rapid and robust local-ancestry inference. *Am J Hum Genet* 93,  
758 278-288.
- 759 49. Sabeti, P.C., Reich, D.E., Higgins, J.M., Levine, H.Z., Richter, D.J., Schaffner, S.F., Gabriel,  
760 S.B., Platko, J.V., Patterson, N.J., McDonald, G.J., et al. (2002). Detecting recent  
761 positive selection in the human genome from haplotype structure. *Nature* 419, 832-837.
- 762 50. Szpiech, Z.A., and Hernandez, R.D. (2014). selscan: an efficient multithreaded program to  
763 perform EHH-based scans for positive selection. *Mol Biol Evol* 31, 2824-2827.
- 764 51. Bennett, B.J., Davis, R.C., Civelek, M., Orozco, L., Wu, J., Qi, H., Pan, C., Packard, R.R.,  
765 Eskin, E., Yan, M., et al. (2015). Genetic Architecture of Atherosclerosis in Mice: A  
766 Systems Genetics Analysis of Common Inbred Strains. *PLoS Genet* 11, e1005711.
- 767 52. Puppione, D.L., and Charugundla, S. (1994). A microprecipitation technique suitable for  
768 measuring alpha-lipoprotein cholesterol. *Lipids* 29, 595-597.
- 769 53. Hedrick, C.C., Castellani, L.W., Warden, C.H., Puppione, D.L., and Lusis, A.J. (1993).  
770 Influence of mouse apolipoprotein A-II on plasma lipoproteins in transgenic mice. *J Biol*  
771 *Chem* 268, 20676-20682.
- 772 54. Ghazalpour, A., Bennett, B., Petyuk, V.A., Orozco, L., Hagopian, R., Mungrue, I.N., Farber,  
773 C.R., Sinsheimer, J., Kang, H.M., Furlotte, N., et al. (2011). Comparative analysis of  
774 proteome and transcriptome variation in mouse. *PLoS Genet* 7, e1001393.
- 775 55. Bennett, B.J., Farber, C.R., Orozco, L., Kang, H.M., Ghazalpour, A., Siemers, N., Neubauer,  
776 M., Neuhaus, I., Yordanova, R., Guan, B., et al. (2010). A high-resolution association  
777 mapping panel for the dissection of complex traits in mice. *Genome Res* 20, 281-290.
- 778 56. Leek, J.T., Johnson, W.E., Parker, H.S., Jaffe, A.E., and Storey, J.D. (2012). The sva  
779 package for removing batch effects and other unwanted variation in high-throughput  
780 experiments. *Bioinformatics* 28, 882-883.
- 781 57. Hui, S.T., Kurt, Z., Tuominen, I., Norheim, F., R, C.D., Pan, C., Dirks, D.L., Magyar, C.E.,  
782 French, S.W., Chella Krishnan, K., et al. (2018). The Genetic Architecture of Diet-  
783 Induced Hepatic Fibrosis in Mice. *Hepatology* 68, 2182-2196.
- 784 58. Kim, D., Pertea, G., Trapnell, C., Pimentel, H., Kelley, R., and Salzberg, S.L. (2013).  
785 TopHat2: accurate alignment of transcriptomes in the presence of insertions, deletions  
786 and gene fusions. *Genome Biol* 14, R36.
- 787 59. Trapnell, C., Williams, B.A., Pertea, G., Mortazavi, A., Kwan, G., van Baren, M.J., Salzberg,  
788 S.L., Wold, B.J., and Pachter, L. (2010). Transcript assembly and quantification by RNA-  
789 Seq reveals unannotated transcripts and isoform switching during cell differentiation. *Nat*  
790 *Biotechnol* 28, 511-515.
- 791 60. Willer, C.J., Li, Y., and Abecasis, G.R. (2010). METAL: fast and efficient meta-analysis of  
792 genomewide association scans. *Bioinformatics* 26, 2190-2191.
- 793 61. Yang, J., Lee, S.H., Goddard, M.E., and Visscher, P.M. (2011). GCTA: a tool for genome-  
794 wide complex trait analysis. *Am J Hum Genet* 88, 76-82.

- 795 62. Rucker, G., Schwarzer, G., Carpenter, J.R., Binder, H., and Schumacher, M. (2011).  
796 Treatment-effect estimates adjusted for small-study effects via a limit meta-analysis.  
797 *Biostatistics* 12, 122-142.
- 798 63. Pruim, R.J., Welch, R.P., Sanna, S., Teslovich, T.M., Chines, P.S., Gliedt, T.P., Boehnke,  
799 M., Abecasis, G.R., and Willer, C.J. (2010). LocusZoom: regional visualization of  
800 genome-wide association scan results. *Bioinformatics* 26, 2336-2337.
- 801 64. Langfelder, P., and Horvath, S. (2008). WGCNA: an R package for weighted correlation  
802 network analysis. *BMC Bioinformatics* 9, 559.
- 803 65. Zhou, Y., Zhou, B., Pache, L., Chang, M., Khodabakhshi, A.H., Tanaseichuk, O., Benner, C.,  
804 and Chanda, S.K. (2019). Metascape provides a biologist-oriented resource for the  
805 analysis of systems-level datasets. *Nat Commun* 10, 1523.
- 806 66. Chen, J., Bardes, E.E., Aronow, B.J., and Jegga, A.G. (2009). ToppGene Suite for gene list  
807 enrichment analysis and candidate gene prioritization. *Nucleic Acids Res* 37, W305-311.
- 808 67. Reimand, J., Isserlin, R., Voisin, V., Kucera, M., Tannus-Lopes, C., Rostamianfar, A., Wadi,  
809 L., Meyer, M., Wong, J., Xu, C., et al. (2019). Pathway enrichment analysis and  
810 visualization of omics data using g:Profiler, GSEA, Cytoscape and EnrichmentMap. *Nat*  
811 *Protoc* 14, 482-517.
- 812 68. Kontush, A., Lhomme, M., and Chapman, M.J. (2013). Unraveling the complexities of the  
813 HDL lipidome. *J Lipid Res* 54, 2950-2963.
- 814 69. Ding, M., and Rexrode, K.M. (2020). A Review of Lipidomics of Cardiovascular Disease  
815 Highlights the Importance of Isolating Lipoproteins. *Metabolites* 10.
- 816 70. Rojas, R., Aguilar-Salinas, C.A., Jimenez-Corona, A., Shamah-Levy, T., Rauda, J., Avila-  
817 Burgos, L., Villalpando, S., and Ponce, E.L. (2010). Metabolic syndrome in Mexican  
818 adults: results from the National Health and Nutrition Survey 2006. *Salud Publica Mex* 52  
819 *Suppl* 1, S11-18.
- 820 71. Oliveira, H.C.F., and Raposo, H.F. (2020). Cholesteryl Ester Transfer Protein and Lipid  
821 Metabolism and Cardiovascular Diseases. *Adv Exp Med Biol* 1276, 15-25.
- 822 72. Ponce, X., Rodriguez-Ramirez, S., Mundo-Rosas, V., Shamah, T., Barquera, S., and  
823 Gonzalez de Cossio, T. (2014). Dietary quality indices vary with sociodemographic  
824 variables and anthropometric status among Mexican adults: a cross-sectional study.  
825 Results from the 2006 National Health and Nutrition Survey. *Public Health Nutr* 17, 1717-  
826 1728.
- 827 73. Gombojav, B., Lee, S.J., Kho, M., Song, Y.M., Lee, K., and Sung, J. (2016). Multiple  
828 susceptibility loci at chromosome 11q23.3 are associated with plasma triglyceride in East  
829 Asians. *J Lipid Res* 57, 318-324.
- 830 74. Moon, S., Lee, Y., Won, S., and Lee, J. (2018). Multiple genotype-phenotype association  
831 study reveals intronic variant pair on *SIRT2* associated with metabolic syndrome in a  
832 Korean population. *Hum Genomics* 12, 48.
- 833 75. Prats-Urbe, A., Sayols-Baixeras, S., Fernandez-Sanles, A., Subirana, I., Carreras-Torres,  
834 R., Vilahur, G., Civeira, F., Marrugat, J., Fito, M., Hernaez, A., et al. (2020). High-density  
835 lipoprotein characteristics and coronary artery disease: a Mendelian randomization study.  
836 *Metabolism* 112, 154351.
- 837 76. Karjalainen, M.K., Holmes, M.V., Wang, Q., Anufrieva, O., Kahonen, M., Lehtimaki, T.,  
838 Havulinna, A.S., Kristiansson, K., Salomaa, V., Perola, M., et al. (2020). Apolipoprotein  
839 A-I concentrations and risk of coronary artery disease: A Mendelian randomization study.  
840 *Atherosclerosis* 299, 56-63.
- 841 77. Richardson, T.G., Sanderson, E., Palmer, T.M., Ala-Korpela, M., Ference, B.A., Davey  
842 Smith, G., and Holmes, M.V. (2020). Evaluating the relationship between circulating  
843 lipoprotein lipids and apolipoproteins with risk of coronary heart disease: A multivariable  
844 Mendelian randomisation analysis. *PLoS Med* 17, e1003062.

- 845 78. Ference, B.A., Kastelein, J.J.P., Ray, K.K., Ginsberg, H.N., Chapman, M.J., Packard, C.J.,  
846 Laufs, U., Oliver-Williams, C., Wood, A.M., Butterworth, A.S., et al. (2019). Association of  
847 Triglyceride-Lowering LPL Variants and LDL-C-Lowering LDLR Variants With Risk of  
848 Coronary Heart Disease. *JAMA* 321, 364-373.
- 849 79. Zuber, V., Gill, D., Ala-Korpela, M., Langenberg, C., Butterworth, A., Bottolo, L., and  
850 Burgess, S. (2020). High-throughput multivariable Mendelian randomization analysis  
851 prioritizes apolipoprotein B as key lipid risk factor for coronary artery disease. *medRxiv*,  
852 2020.2002.2010.20021691.
- 853 80. Marmillot, P., Patel, S., and Lakshman, M.R. (2007). Reverse cholesterol transport is  
854 regulated by varying fatty acyl chain saturation and sphingomyelin content in  
855 reconstituted high-density lipoproteins. *Metabolism* 56, 251-259.
- 856 81. Zerrad-Saadi, A., Therond, P., Chantepie, S., Couturier, M., Rye, K.A., Chapman, M.J., and  
857 Kontush, A. (2009). HDL3-mediated inactivation of LDL-associated phospholipid  
858 hydroperoxides is determined by the redox status of apolipoprotein A-I and HDL particle  
859 surface lipid rigidity: relevance to inflammation and atherogenesis. *Arterioscler Thromb*  
860 *Vasc Biol* 29, 2169-2175.
- 861 82. Hancock-Cerutti, W., Lhomme, M., Dauteuille, C., Lecocq, S., Chapman, M.J., Rader, D.J.,  
862 Kontush, A., and Cuchel, M. (2017). Paradoxical coronary artery disease in humans with  
863 hyperalphalipoproteinemia is associated with distinct differences in the high-density  
864 lipoprotein phosphosphingolipidome. *J Clin Lipidol* 11, 1192-1200 e1193.
- 865 83. Camont, L., Lhomme, M., Rached, F., Le Goff, W., Negre-Salvayre, A., Salvayre, R.,  
866 Calzada, C., Lagarde, M., Chapman, M.J., and Kontush, A. (2013). Small, dense high-  
867 density lipoprotein-3 particles are enriched in negatively charged phospholipids:  
868 relevance to cellular cholesterol efflux, antioxidative, antithrombotic, anti-inflammatory,  
869 and antiapoptotic functionalities. *Arterioscler Thromb Vasc Biol* 33, 2715-2723.
- 870 84. Holzer, M., Birner-Gruenberger, R., Stojakovic, T., El-Gamal, D., Binder, V., Wadsack, C.,  
871 Heinemann, A., and Marsche, G. (2011). Uremia alters HDL composition and function. *J*  
872 *Am Soc Nephrol* 22, 1631-1641.
- 873 85. Darabi, M., and Kontush, A. (2016). Phosphatidylserine in atherosclerosis. *Curr Opin Lipidol*  
874 27, 414-420.
- 875 86. Jialin, G., Xuefan, G., and Huiwen, Z. (2010). SID1 transmembrane family, member 2  
876 (Sidt2): a novel lysosomal membrane protein. *Biochem Biophys Res Commun* 402, 588-  
877 594.
- 878 87. Ren, R., Xu, X., Lin, T., Weng, S., Liang, H., Huang, M., Dong, C., Luo, Y., and He, J.  
879 (2011). Cloning, characterization, and biological function analysis of the SidT2 gene from  
880 *Siniperca chuatsi*. *Dev Comp Immunol* 35, 692-701.
- 881 88. Li, W., Koutmou, K.S., Leahy, D.J., and Li, M. (2015). Systemic RNA Interference  
882 Deficiency-1 (SID-1) Extracellular Domain Selectively Binds Long Double-stranded RNA  
883 and Is Required for RNA Transport by SID-1. *J Biol Chem* 290, 18904-18913.
- 884 89. Aizawa, S., Contu, V.R., Fujiwara, Y., Hase, K., Kikuchi, H., Kabuta, C., Wada, K., and  
885 Kabuta, T. (2017). Lysosomal membrane protein SIDT2 mediates the direct uptake of  
886 DNA by lysosomes. *Autophagy* 13, 218-222.
- 887 90. Nguyen, T.A., Smith, B.R.C., Elgass, K.D., Creed, S.J., Cheung, S., Tate, M.D., Belz, G.T.,  
888 Wicks, I.P., Masters, S.L., and Pang, K.C. (2019). SIDT1 Localizes to Endolysosomes  
889 and Mediates Double-Stranded RNA Transport into the Cytoplasm. *J Immunol* 202,  
890 3483-3492.
- 891 91. Hase, K., Contu, V.R., Kabuta, C., Sakai, R., Takahashi, M., Kataoka, N., Hakuno, F.,  
892 Takahashi, S.I., Fujiwara, Y., Wada, K., et al. (2020). Cytosolic domain of SIDT2 carries  
893 an arginine-rich motif that binds to RNA/DNA and is important for the direct transport of  
894 nucleic acids into lysosomes. *Autophagy*, 1-15.

- 895 92. Valdes, V.J., Athie, A., Salinas, L.S., Navarro, R.E., and Vaca, L. (2012). CUP-1 is a novel  
896 protein involved in dietary cholesterol uptake in *Caenorhabditis elegans*. *PLoS One* 7,  
897 e33962.
- 898 93. Hulce, J.J., Coggnetta, A.B., Niphakis, M.J., Tully, S.E., and Cravatt, B.F. (2013). Proteome-  
899 wide mapping of cholesterol-interacting proteins in mammalian cells. *Nat Methods* 10,  
900 259-264.
- 901 94. Sharpe, L.J., Rao, G., Jones, P.M., Glancey, E., Aleidi, S.M., George, A.M., Brown, A.J., and  
902 Gelissen, I.C. (2015). Cholesterol sensing by the ABCG1 lipid transporter: Requirement  
903 of a CRAC motif in the final transmembrane domain. *Biochim Biophys Acta* 1851, 956-  
904 964.
- 905 95. Ouimet, M., Franklin, V., Mak, E., Liao, X., Tabas, I., and Marcel, Y.L. (2011). Autophagy  
906 regulates cholesterol efflux from macrophage foam cells via lysosomal acid lipase. *Cell*  
907 *Metab* 13, 655-667.
- 908 96. Chen, X., Gu, X., and Zhang, H. (2018). Sidt2 regulates hepatocellular lipid metabolism  
909 through autophagy. *J Lipid Res* 59, 404-415.
- 910 97. Gao, J., Gu, X., Mahuran, D.J., Wang, Z., and Zhang, H. (2013). Impaired glucose tolerance  
911 in a mouse model of sidt2 deficiency. *PLoS One* 8, e66139.
- 912 98. Chang, G., Yang, R., Cao, Y., Nie, A., Gu, X., and Zhang, H. (2016). SIDT2 is involved in the  
913 NAADP-mediated release of calcium from insulin secretory granules. *J Mol Endocrinol*  
914 56, 249-259.
- 915 99. Gao, J., Zhang, Y., Yu, C., Tan, F., and Wang, L. (2016). Spontaneous nonalcoholic fatty  
916 liver disease and ER stress in Sidt2 deficiency mice. *Biochem Biophys Res Commun*  
917 476, 326-332.
- 918 100. Meng, Y., Wang, L., and Ling, L. (2018). Changes of lysosomal membrane permeabilization  
919 and lipid metabolism in sidt2 deficient mice. *Exp Ther Med* 16, 246-252.
- 920  
921  
922

923 **FIGURE TITLES AND LEGENDS**

924  
925 **Figure 1. Manhattan plot for HDL-C levels in the discovery phase.** Plot showing the  $-\log_{10}$   
926 transformed  $P$ -value of SNPs for 2153 Mexican children and adults. The red line indicates the  
927 genome-wide significance level ( $P=5 \times 10^{-8}$ ). Genes closest to the SNP with the lowest  $P$ -value at  
928 each locus are indicated.

929  
930 **Figure 2. Locus zoom view of variants within the 11q23 region (*SIDT2* locus) associated**  
931 **with HDL-C levels.** SNPs are colored based on their correlation ( $r^2$ ) with the *SIDT2*/Val636Ile  
932 variant (purple diamond), which showed the strongest association with HDL-C levels ( $P=1.5 \times 10^{-$   
933  $11$ ). Arrows on the horizontal blue lines show the direction of transcription, and rectangles  
934 represent exons.  $P$ -values indicate significance of associations found in the discovery phase.

935  
936 **Figure 3. Heat map of associations between the *SIDT2*/Val636Ile variant and lipid classes**  
937 **in the MOBES cohort.** Color intensity reflects the Beta value (red for positive, blue for negative)  
938 obtained from linear regression between *SIDT2*/Val636Ile and lipid classes in the MOBES study  
939 ( $n=375$ ) adjusted by age, sex and BMI. \* $P$ -value  $\leq 0.05$ , \*\*  $P$ -value  $\leq 0.001$ .

940  
941 **Figure 4. Uptake of the blue fluorescent cholesterol analog dehydroergosterol (DHE) by**  
942 **cells expressing wildtype and Ile636/*SIDT2*.** (A) Confocal microscopy images of HEK293T  
943 cells expressing the empty vector, wildtype and Ile636/*SIDT2*, at times 2.5, 3.5 and 5 minutes  
944 after adding the fluorescent cholesterol analog DHE to the culture. (B) Plot showing mean  
945 fluorescence intensity over time after adding DHE to the culture. Values show mean  $\pm$  standard  
946 deviations from at least 4 independent experiments, each experiment shows mean values from  
947 all the cells in the focal plane. The red dots represent cells transfected with the empty vector; the  
948 black dots represent cells expressing wildtype *SIDT2*, and blue dots represent cells expressing  
949 Ile636/*SIDT2*. Addition of DHE is indicated with an arrow. \* $P < 0.05$ ; \*\* $P < 0.01$ .

950  
951 **Figure 5. Liver *SIDT2* expression and lipids in mice and humans.** Correlations of liver *SidT2*  
952 expression with HDL-C, total cholesterol, and TG serum levels in MOBES cohort participants (A)  
953 and mice from the HMDP (B). (C) Venn diagram depicting the overlap of genes significantly  
954 correlated with *SIDT2* liver expression in HMDP mice and MOBES cohort participants  
955 ( $P < 1.0 \times 10^{-8}$ ). (D) Significantly enriched pathways in mice and humans.

956



957 **Video S1. Uptake of the fluorescent cholesterol analog dehydroergosterol (DHE) in**  
958 **HEK293T cells expressing wildtype or Ile636/SIDT2.** Representative experiments illustrating  
959 cells in the focal plane. Fluorescence was monitored in time using confocal microscopy. DHE  
960 uptake in cells expressing the empty vector (upper panel), wildtype SIDT2 and the Ile636/SIDT2  
961 proteins (lower panels).

**Table 1. Lead SNPs associated with HDL-C levels in the meta-analysis including Mexican children and adults.**

| CHR: position (hg19) | Locus                                     | rs ID      | Type of variant           | $\beta$ HDL-C (SE) | P-value                  |
|----------------------|-------------------------------------------|------------|---------------------------|--------------------|--------------------------|
| 6: 160921566         | <i>LPAL2</i>                              | rs9457930  | Intron variant            | 1.19 (0.33)        | 6.93 x 10 <sup>-6</sup>  |
| 8: 9177732           | <i>PRPF31, PPP1R3B, TNKS</i>              | rs983309   | Intron variant            | -1.83 (0.34)       | 4.48 x 10 <sup>-6</sup>  |
| 9: 107589134         | <i>ABCA1</i>                              | rs4149310  | Intron variant            | 1.44 (0.32)        | 7.25 x 10 <sup>-7</sup>  |
| 9: 107620835         | <i>ABCA1</i>                              | rs9282541  | Missense variant          | -3.44 (0.48)       | 3.99 x 10 <sup>-13</sup> |
| 11: 116633947        | <i>BUD13-ZPR1-APOC3-APOA4-APOA5-APOA1</i> | rs10488698 | Missense variant          | 2.38 (0.44)        | 8.17 x 10 <sup>-8</sup>  |
| 11: 117063003        | <i>SIDT2</i>                              | rs17120425 | Missense variant          | 3.31 (0.51)        | 1.52 x 10 <sup>-11</sup> |
| 12: 43679673         | <i>ADAMTS20</i>                           | rs1514661  | Regulatory region variant | 1.12 (0.34)        | 4.23 x 10 <sup>-6</sup>  |
| 15: 58723479         | <i>LIPC, ALDH1A2</i>                      | rs1077834  | Intron variant            | -1.55 (0.33)       | 8.57 x 10 <sup>-7</sup>  |
| 16: 56985555         | <i>CETP</i>                               | rs12448528 | Regulatory region variant | -2.79 (0.39)       | 5.92 x 10 <sup>-15</sup> |
| 16: 56999328         | <i>CETP</i>                               | rs11508026 | Intron variant            | 3.02 (0.32)        | 4.46 x 10 <sup>-18</sup> |

HDL-C values were log transformed for the analysis. Effect sizes were calculated for minor alleles. P-values for additive models were adjusted for sex, age, and either BMI or BMI percentile in children (n=2,153). HDL-C, High-density lipoprotein cholesterol; CHR: Chromosome; SE, Standard error.

**Table 2. Association of selected SNPs with lipid traits in the GEA cohort.**

| CHR: position<br>(hg19) | Locus                                               | rs ID      | HDL-C           |                       | TC              |         | LDL-C           |         | TG               |         | ApoA1            |                      | ApoB            |         |
|-------------------------|-----------------------------------------------------|------------|-----------------|-----------------------|-----------------|---------|-----------------|---------|------------------|---------|------------------|----------------------|-----------------|---------|
|                         |                                                     |            | B (SE)          | P-value               | B (SE)          | P-value | B (SE)          | P-value | B (SE)           | P-value | B (SE)           | P-value              | B (SE)          | P-value |
| 6: 160921566            | <i>LPAL2</i>                                        | rs9457930  | 0.59<br>(0.49)  | 0.230                 | 2.40<br>(1.55)  | 0.123   | 1.49<br>(1.31)  | 0.322   | 5.32<br>(6.24)   | 0.837   | -0.02<br>(1.39)  | 0.920                | 1.16<br>(1.15)  | 0.286   |
| 8: 9177732              | <i>PRPF31,<br/>PPP1R3B, TNKS</i>                    | rs983309   | -2.32<br>(0.50) | 4.0x10 <sup>-6</sup>  | -4.30<br>(1.60) | 0.007   | -2.69<br>(1.35) | 0.016   | 4.03<br>(6.46)   | 0.076   | -4.80<br>(1.43)  | 0.001                | 0.19<br>(1.19)  | 0.982   |
| 9: 107589134            | <i>ABCA1</i>                                        | rs4149310  | 1.25<br>(0.49)  | 0.010                 | 3.68<br>(1.55)  | 0.018   | 0.83<br>(1.32)  | 0.650   | 14.86<br>(6.22)  | 0.011   | 4.22<br>(1.38)   | 0.001                | 0.94<br>(1.15)  | 0.371   |
| 9: 107620835            | <i>ABCA1</i>                                        | rs9282541  | -4.22<br>(0.98) | 2.0x10 <sup>-5</sup>  | -6.29<br>(2.85) | 0.027   | -2.23<br>(2.53) | 0.622   | 0.68<br>(8.33)   | 0.640   | -11.02<br>(3.10) | 5.3x10 <sup>-5</sup> | -1.46<br>(2.28) | 0.607   |
| 11: 116633947           | <i>BUD13-ZPR1-<br/>APOC3-APOA4-<br/>APOA5-APOA1</i> | rs10488698 | 2.75<br>(0.69)  | 6.5x10 <sup>-5</sup>  | -4.17<br>(2.20) | 0.058   | -4.58<br>(1.85) | 0.027   | -16.94<br>(8.83) | 0.048   | 4.65<br>(1.96)   | 0.018                | -4.10<br>(1.63) | 0.017   |
| 11: 117063003           | <i>SIDT2</i>                                        | rs17120425 | 3.35<br>(0.75)  | 7.0x10 <sup>-6</sup>  | -3.66<br>(2.31) | 0.114   | -6.22<br>(1.96) | 0.004   | -4.75<br>(8.75)  | 0.477   | 10.29<br>(2.14)  | 2.6x10 <sup>-6</sup> | -3.92<br>(1.74) | 0.038   |
| 12: 43679673            | <i>ADAMTS20</i>                                     | rs1514661  | -0.12<br>(0.50) | 0.805                 | -0.25<br>(1.57) | 0.874   | -0.03<br>(1.32) | 0.773   | 0.43<br>(6.35)   | 0.492   | -0.80<br>(1.41)  | 0.677                | 0.84<br>(1.16)  | 0.381   |
| 15: 58723479            | <i>LIPC, ALDH1A2</i>                                | rs1077834  | -0.59<br>(0.46) | 0.200                 | -0.15<br>(1.46) | 0.919   | 1.66<br>(1.23)  | 0.090   | -5.44<br>(5.87)  | 0.025   | -3.77<br>(1.30)  | 0.009                | -0.90<br>(1.08) | 0.281   |
| 16: 56985555            | <i>CETP</i>                                         | rs12448528 | -3.77<br>(0.57) | 7.2x10 <sup>-11</sup> | -6.02<br>(1.85) | 0.001   | -2.96<br>(1.57) | 0.062   | 3.91<br>(7.48)   | 0.340   | -5.26<br>(1.66)  | 2.1x10 <sup>-4</sup> | -2.09<br>(1.39) | 0.118   |
| 16: 56999328            | <i>CETP</i>                                         | rs11508026 | 2.79<br>(0.47)  | 2.9x10 <sup>-9</sup>  | 2.25<br>(1.51)  | 0.136   | -0.62<br>(1.28) | 0.830   | 1.38<br>(6.06)   | 0.621   | 4.08<br>(1.35)   | 0.001                | -0.49<br>(1.12) | 0.979   |

LDL-C, TG, ApoA1 and ApoB levels were log transformed for the analysis. Effect sizes were calculated for the minor alleles. P-values for additive models were adjusted for sex, age, and BMI (n=1,559). CHR: Chromosome; MAF, minor allele frequency; HDL-C, High density lipoprotein cholesterol; TC, Total cholesterol; LDL-C, Low density lipoprotein cholesterol; TG, Triglycerides; ApoA1, Apolipoprotein A1; ApoB, Apolipoprotein B.

**Table 3. Association of selected SNPs with lipid traits in the MOBES cohort.**

| CHR: position<br>(hg19) | Locus                                               | rs ID      | HDL-C        |                      | TC           |         | LDL-C        |         | TG           |         |
|-------------------------|-----------------------------------------------------|------------|--------------|----------------------|--------------|---------|--------------|---------|--------------|---------|
|                         |                                                     |            | B (SE)       | P-value              | B (SE)       | P-value | B (SE)       | P-value | B (SE)       | P-value |
| 6: 160921566            | <i>LPAL2</i>                                        | rs9457930  | 0.23 (0.64)  | 0.724                | 0.72 (2.89)  | 0.802   | 0.22 (2.36)  | 0.581   | -2.49 (5.46) | 0.758   |
| 8: 9177732              | <i>PRPF31,<br/>PPP1R3B, TNKS</i>                    | rs983309   | -0.38 (0.65) | 0.559                | -2.80 (2.81) | 0.319   | -3.54 (2.30) | 0.255   | 6.25 (5.24)  | 0.236   |
| 9: 107589134            | <i>ABCA1</i>                                        | rs4149310  | 0.66 (0.60)  | 0.275                | 3.70 (2.62)  | 0.158   | 3.16 (2.15)  | 0.162   | 2.98 (4.88)  | 0.345   |
| 9: 107620835            | <i>ABCA1</i>                                        | rs9282541  | -3.77 (0.96) | 1.1x10 <sup>-4</sup> | -8.78 (4.27) | 0.040   | -6.38 (3.50) | 0.073   | -4.26 (7.99) | 0.844   |
| 11: 116633947           | <i>BUD13-ZPR1-<br/>APOC3-APOA4-<br/>APOA5-APOA1</i> | rs10488698 | 0.81 (0.87)  | 0.350                | 2.02 (3.78)  | 0.594   | 2.21 (3.10)  | 0.175   | -1.46 (7.05) | 0.906   |
| 11: 117063003           | <i>SIDT2</i>                                        | rs17120425 | 2.92 (0.98)  | 0.003                | 7.79 (4.30)  | 0.071   | 3.72 (3.54)  | 0.226   | 9.15 (8.04)  | 0.196   |
| 12: 43679673            | <i>ADAMTS20</i>                                     | rs1514661  | 0.46 (0.62)  | 0.454                | -0.87 (2.68) | 0.746   | -0.60 (2.20) | 0.490   | -0.81 (5.00) | 0.930   |
| 15: 58723479            | <i>LIPC, ALDH1A2</i>                                | rs1077834  | -0.86 (0.57) | 0.134                | 3.13 (2.50)  | 0.211   | 4.08 (2.05)  | 0.143   | -2.57 (4.67) | 0.264   |
| 16: 56985555            | <i>CETP</i>                                         | rs12448528 | -1.77 (0.72) | 0.014                | -1.71 (3.14) | 0.586   | 0.12 (2.58)  | 0.668   | -0.29 (5.86) | 0.999   |
| 16: 56999328            | <i>CETP</i>                                         | rs11508026 | 2.16 (0.55)  | 9.6x10 <sup>-5</sup> | 0.11 (2.44)  | 0.965   | -1.14 (1.99) | 0.695   | -3.99 (4.54) | 0.277   |

LDL-C and TG levels were log transformed for the analysis. Effect size was calculated for the minor alleles. P-values for additive models were adjusted for sex, age, and BMI (n=555). CHR: Chromosome; MAF, minor allele frequency; HDL-C, High-density lipoprotein cholesterol; TC, Total cholesterol; LDL-C, Low-density lipoprotein cholesterol; TG, Triglycerides.

**Table 4. Association of HDL-C associated SNPs with premature coronary artery disease in the GEA cohort.**

| CHR: position<br>(hg19) | Locus                                          | rs ID      | MAF                   |                            | OR (95% CI)      | P-value              |
|-------------------------|------------------------------------------------|------------|-----------------------|----------------------------|------------------|----------------------|
|                         |                                                |            | Controls<br>(n=1,559) | Premature CAD<br>(n=1,095) |                  |                      |
| 6: 160921566            | <i>LPAL2</i>                                   | rs9457930  | 37.9                  | 37.0                       | 0.98 (0.86-1.11) | 0.704                |
| 8: 9177732              | <i>PRPF31,<br/>PPP1R3B, TNKS</i>               | rs983309   | 29.3                  | 30.5                       | 1.06 (0.93-1.21) | 0.370                |
| 9: 107589134            | <i>ABCA1</i>                                   | rs4149310  | 34.4                  | 36.6                       | 1.11 (0.98-1.26) | 0.116                |
| 9: 107620835            | <i>ABCA1</i>                                   | rs9282541  | 10.4                  | 4.8                        | 0.44 (0.30-0.65) | 3.9x10 <sup>-5</sup> |
| 11: 116633947           | <i>BUD13-ZPR1-APOC3-<br/>APOA4-APOA5-APOA1</i> | rs10488698 | 12.9                  | 10.7                       | 0.80 (0.67-0.97) | 0.023                |
| 11: 117063003           | <i>SIDT2</i>                                   | rs17120425 | 9.5                   | 8.0                        | 0.80 (0.65-0.99) | 0.039                |
| 12: 43679673            | <i>ADAMTS20</i>                                | rs1514661  | 31.1                  | 30.7                       | 0.98 (0.87-1.12) | 0.803                |
| 15: 58723479            | <i>LIPC, ALDH1A2</i>                           | rs1077834  | 42.6                  | 39.1                       | 0.87 (0.77-0.98) | 0.027                |
| 16: 56985555            | <i>CETP</i>                                    | rs12448528 | 20.5                  | 18.1                       | 0.87 (0.75-1.02) | 0.087                |
| 16: 56999328            | <i>CETP</i>                                    | rs11508026 | 36.3                  | 39.0                       | 1.11 (0.99-1.26) | 0.087                |

Associations with premature CAD were adjusted for age, sex and BMI. P-values were calculated by logistic regression. HDL-C, High-density lipoprotein cholesterol; CHR: Chromosome; MAF, minor allele frequency; CAD, coronary artery disease; OR, Odds ratio; CI, confidence interval.

Figure 1

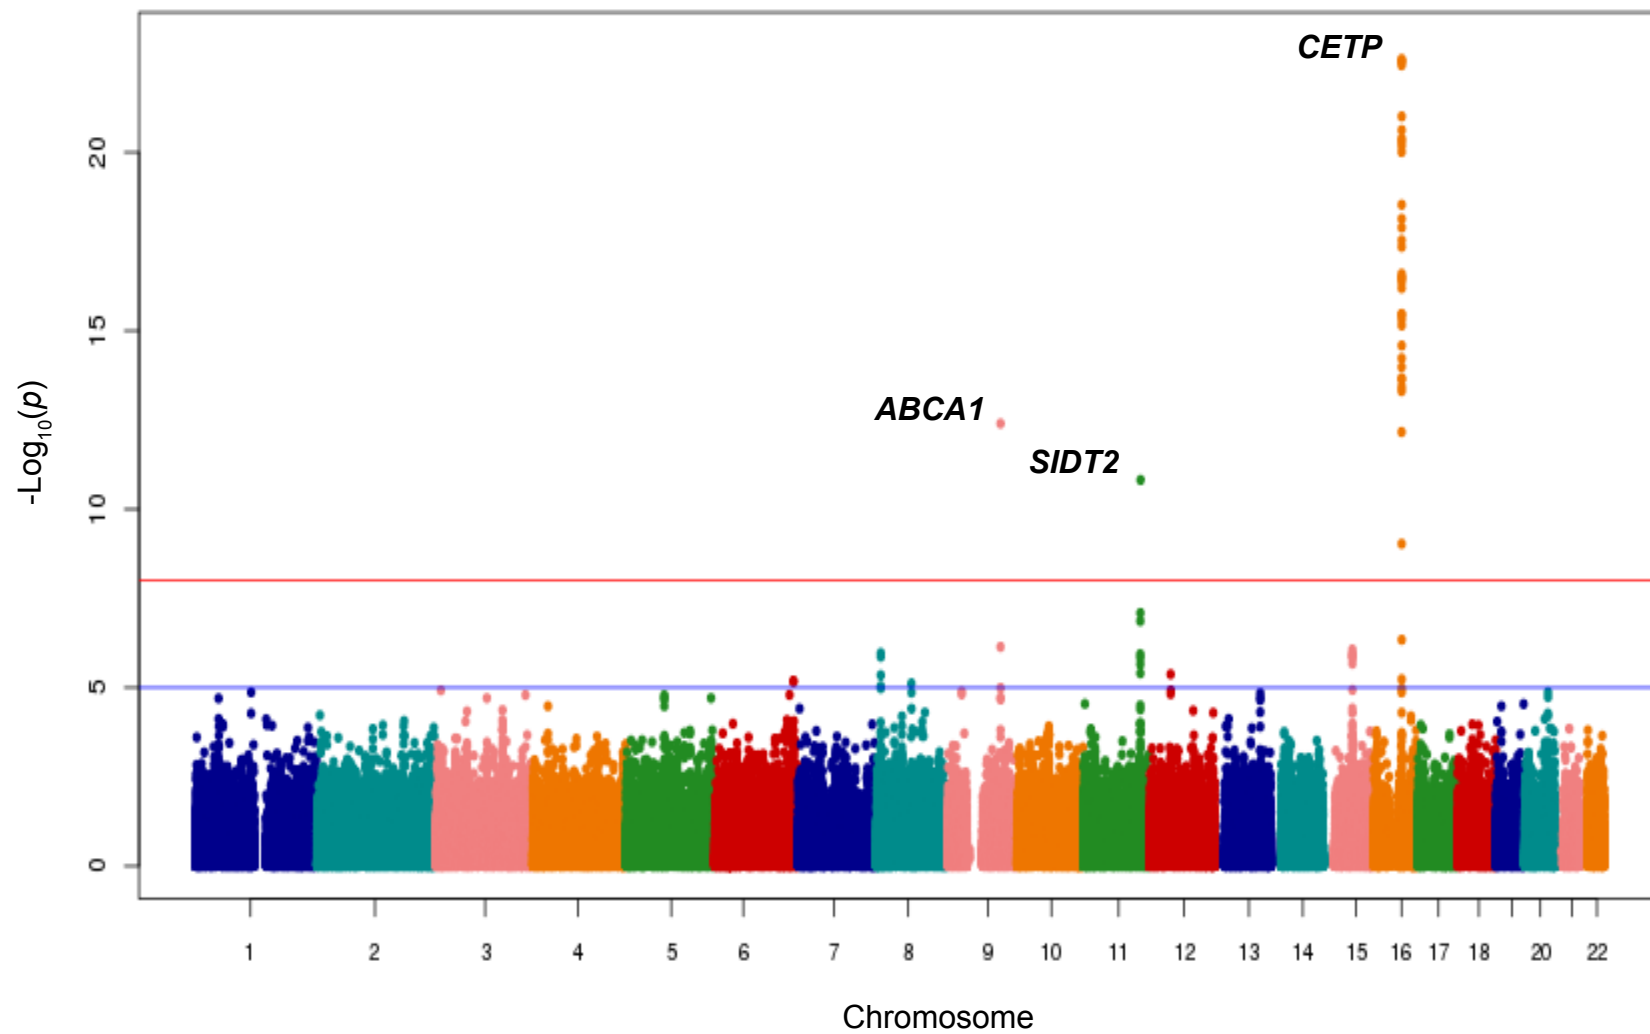

Plotted SNPs

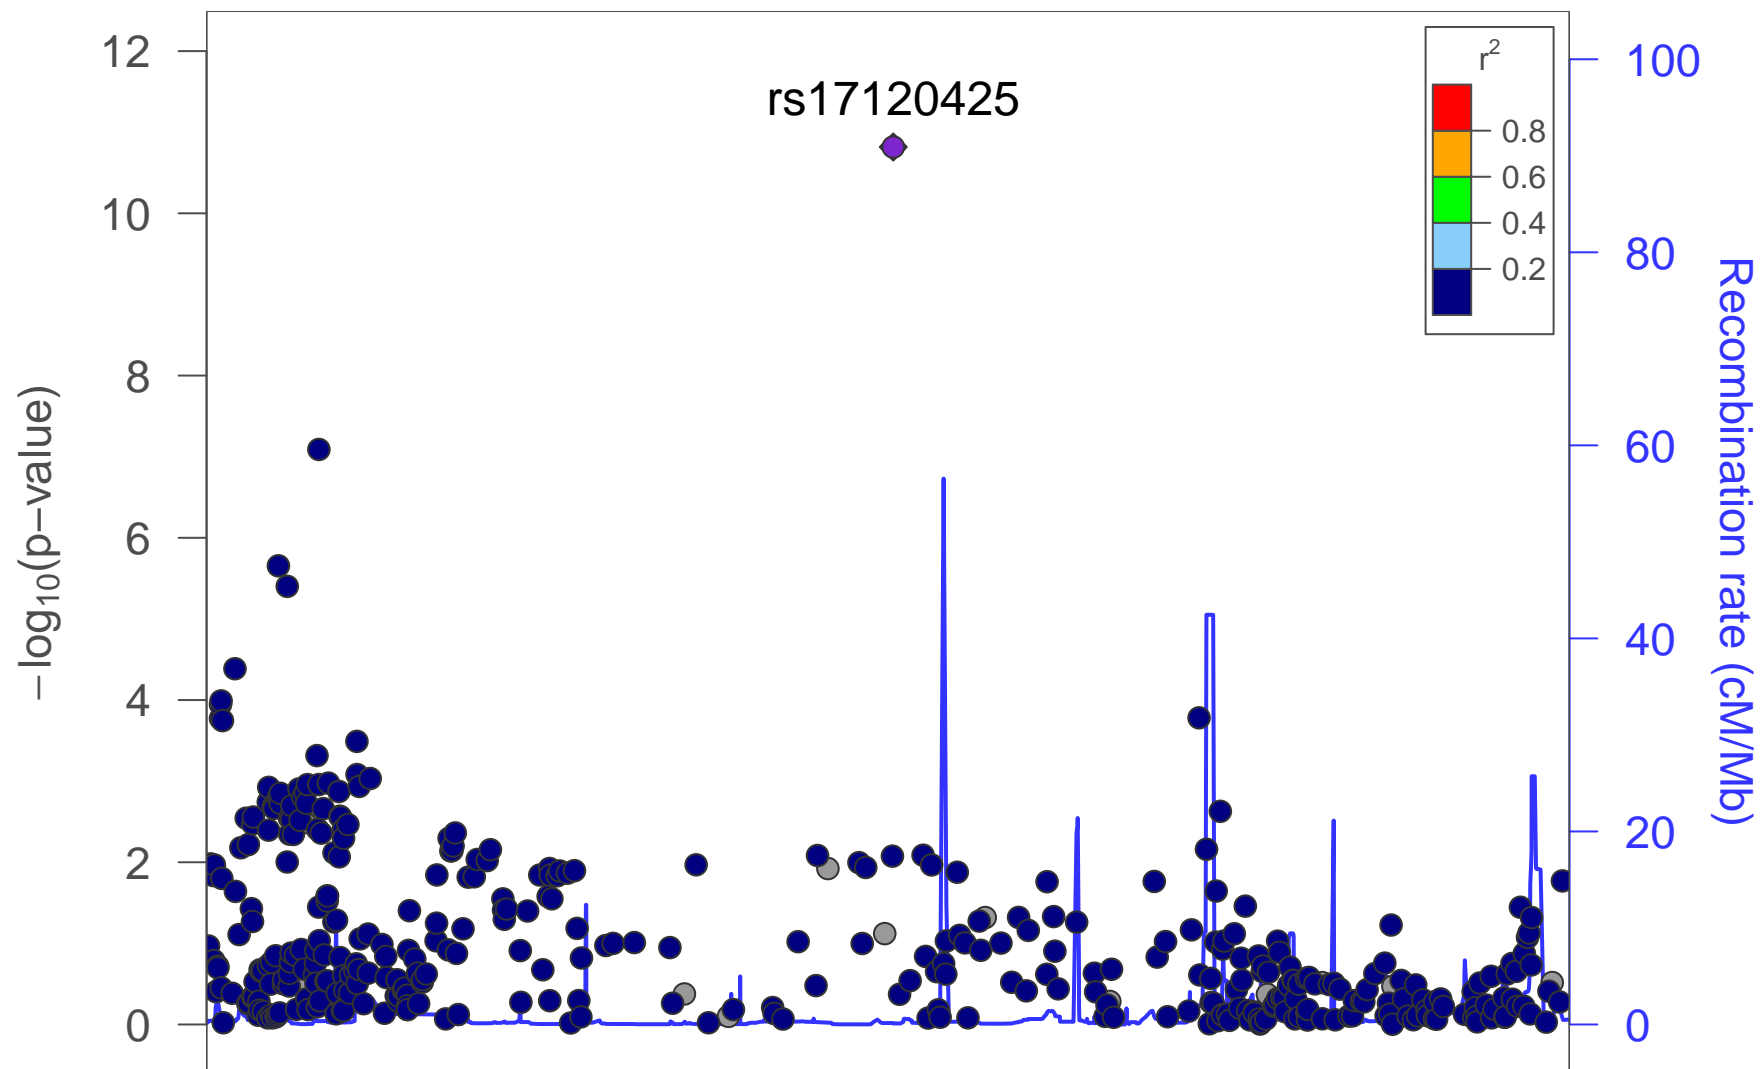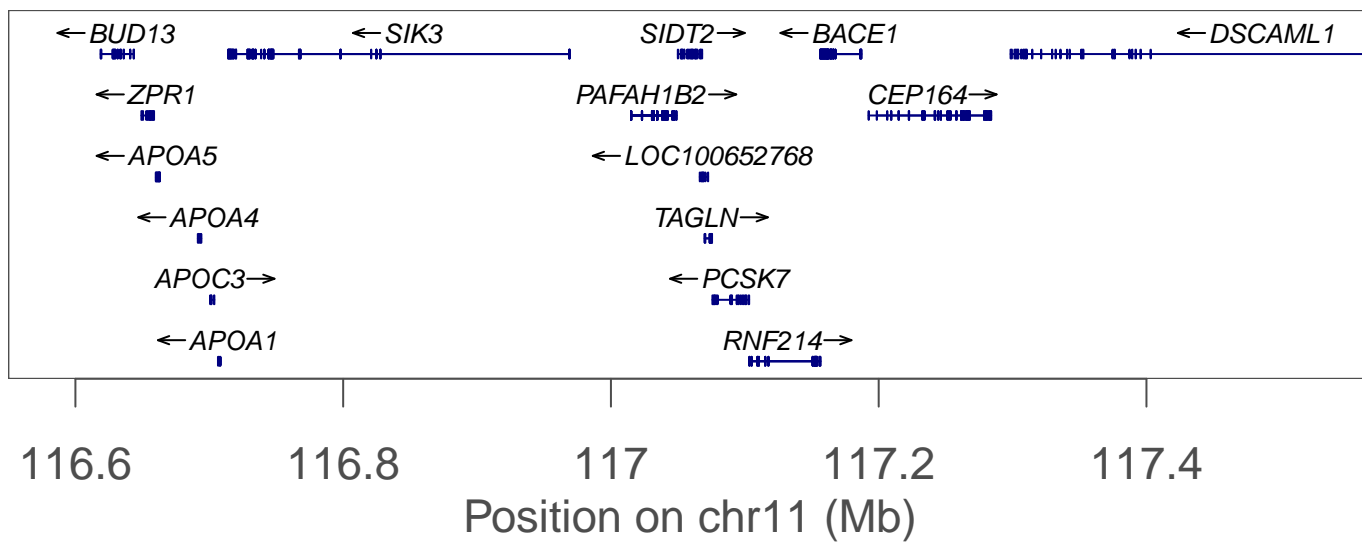

Figure 3

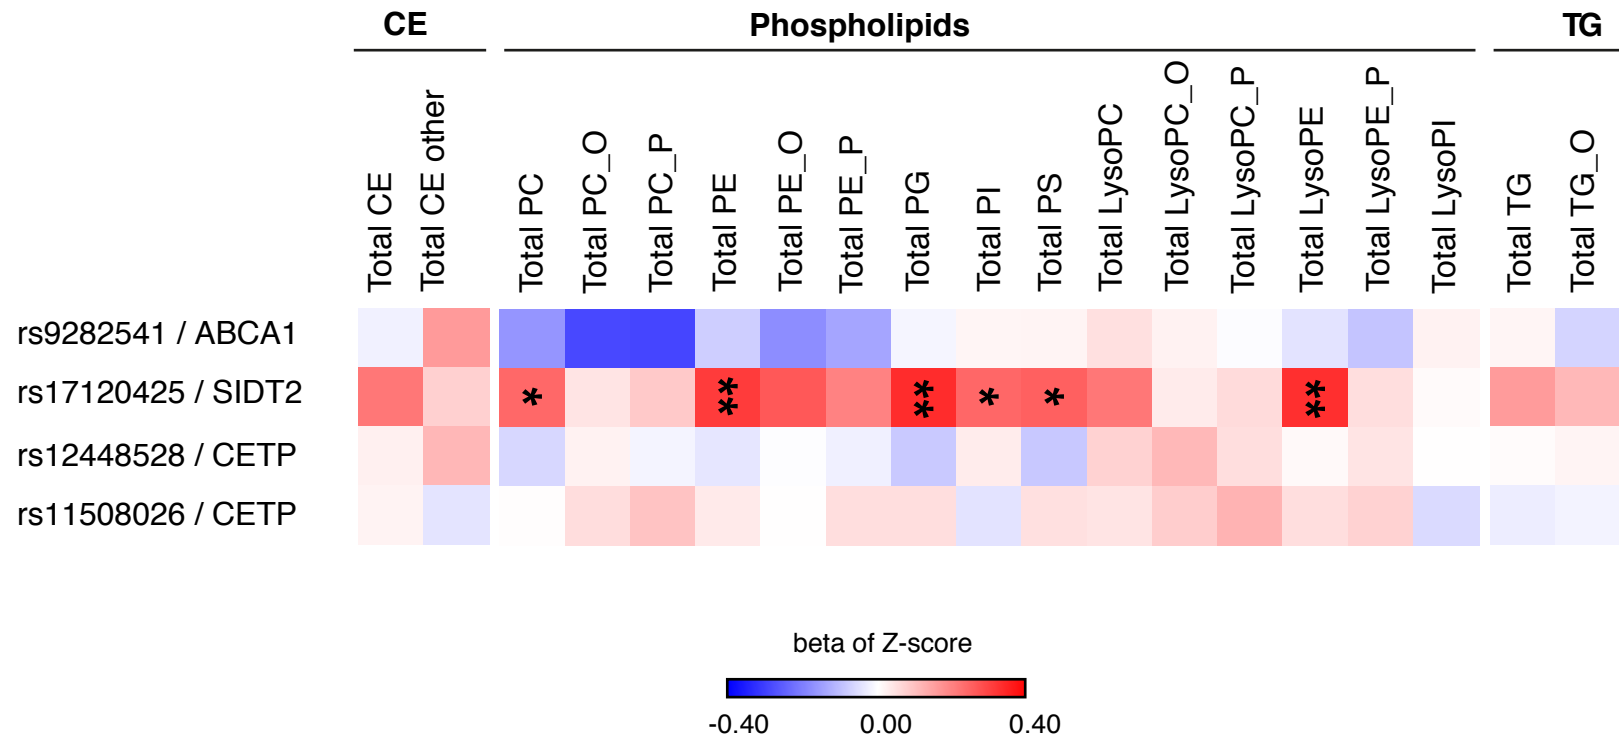



# Figure 4

medRxiv preprint doi: <https://doi.org/10.1101/2020.09.19.20197673>; this version posted September 20, 2020. The copyright holder for this preprint (which was not certified by peer review) is the author/funder, who has granted medRxiv a license to display the preprint in perpetuity. All rights reserved. No reuse allowed without permission.

**A.**

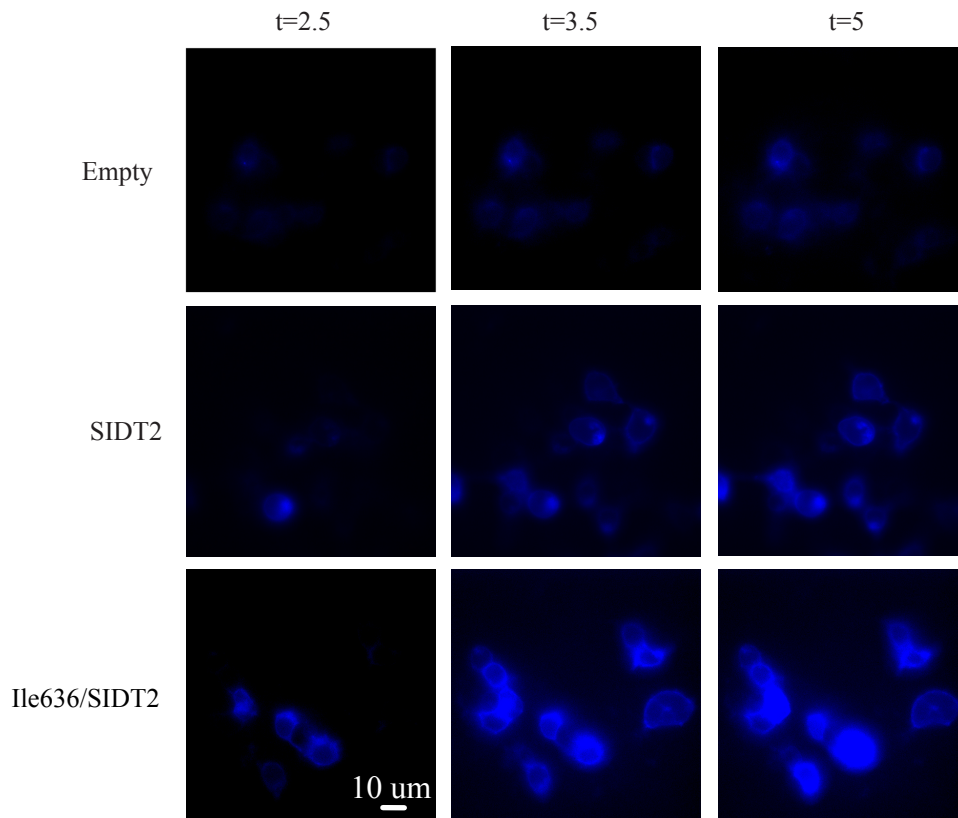

**B.**

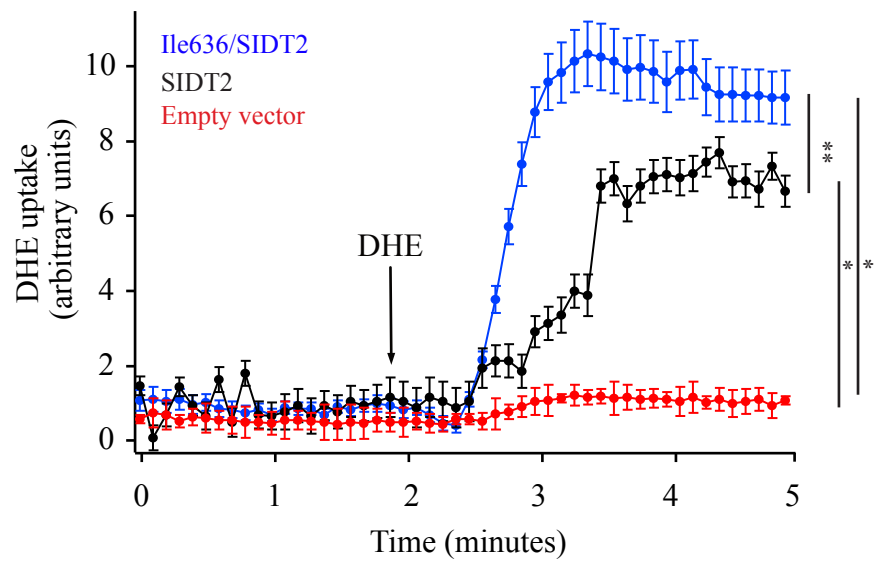

**Figure 5**

**A.**

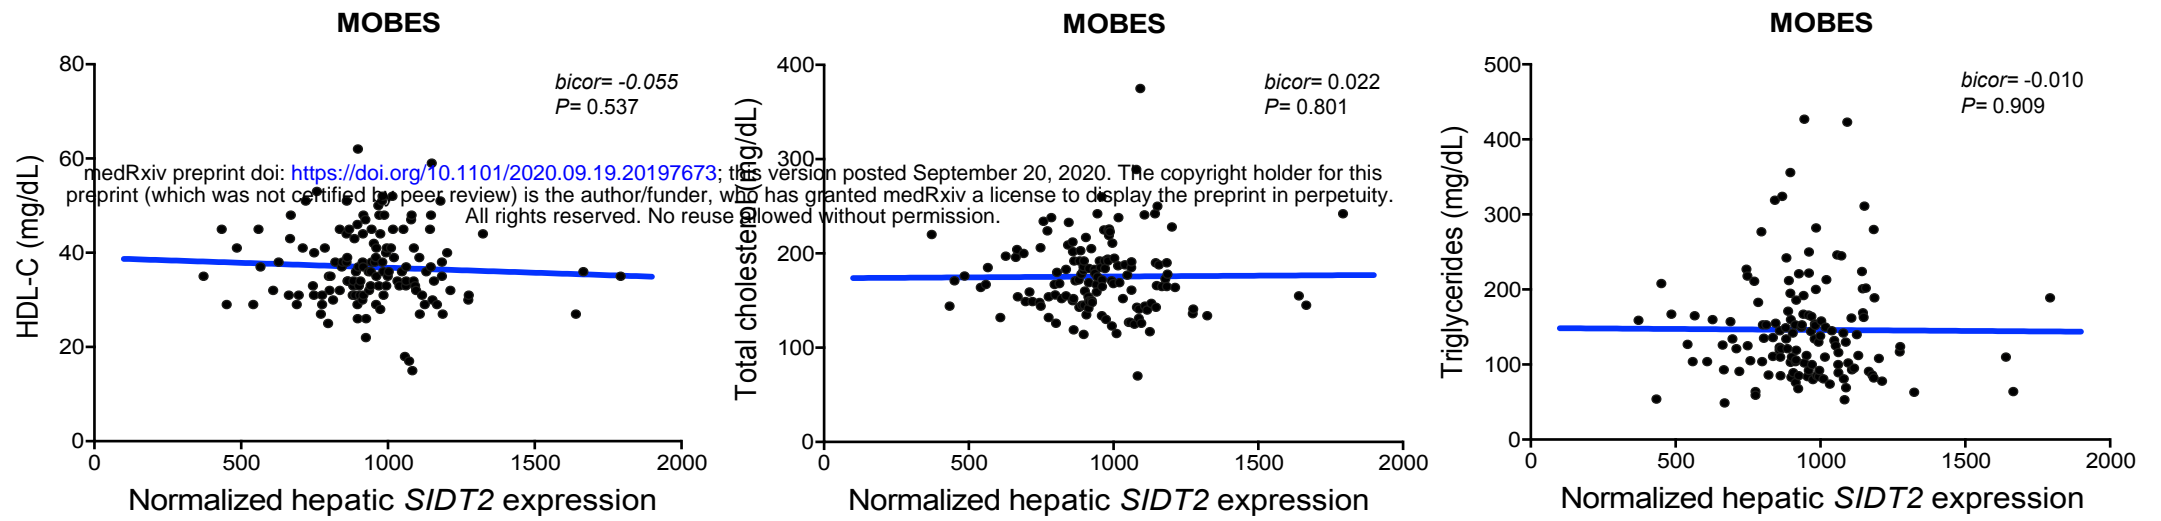

**B.**

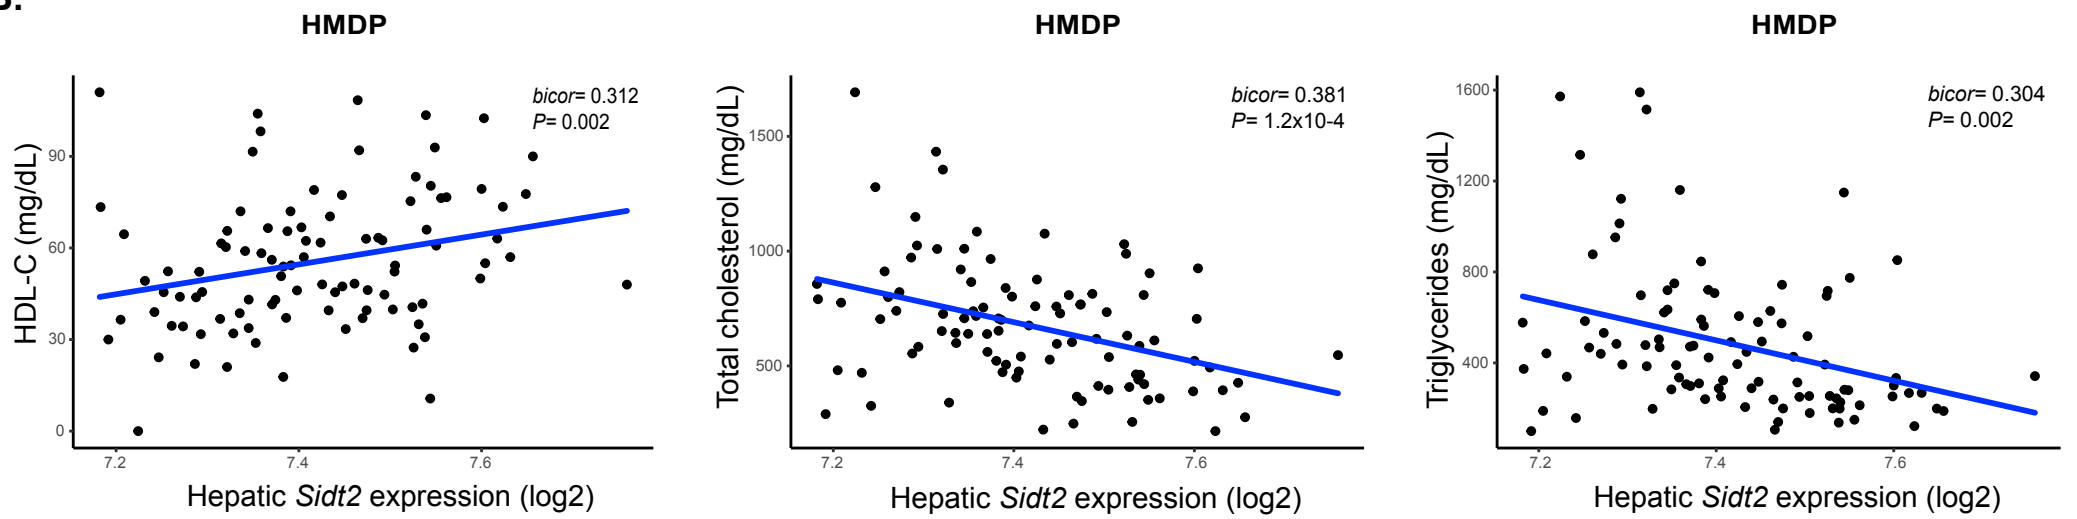

**C.**

**Pathway enrichment analysis (liver)**

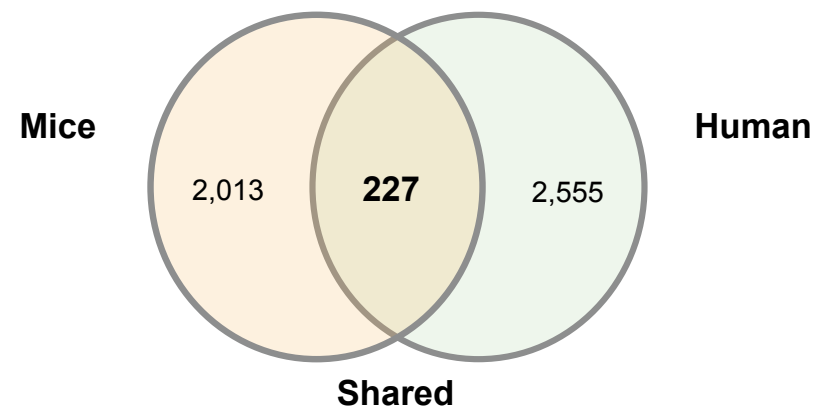

**D.**

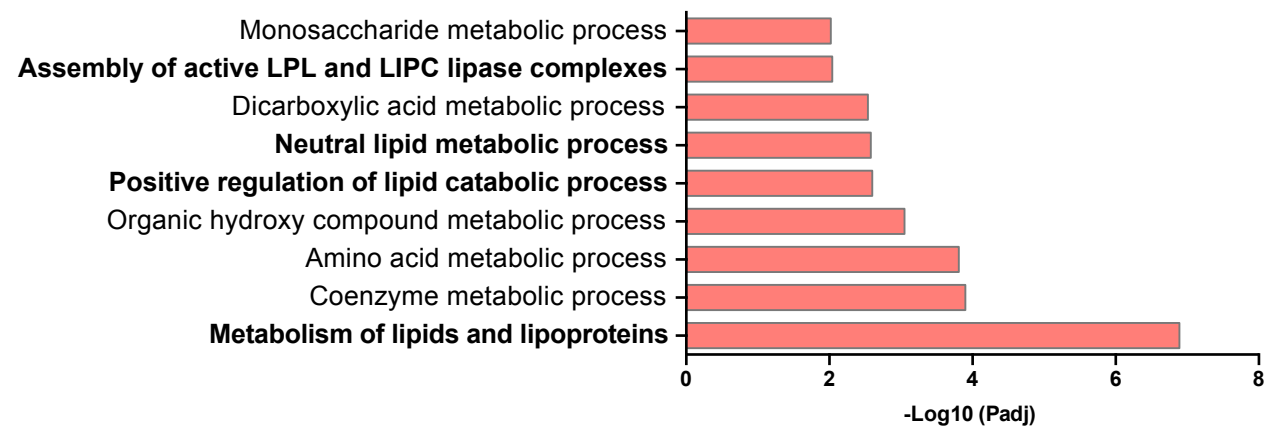

Source: https://medrxiv.org/content/10.1101/2020.09.19.20197673v1.full.pdf
